1     **Temporal epigenomic profiling identifies AHR as a**  
2             **dynamic super-enhancer controlled regulator of**  
3                     **mesenchymal multipotency**

4     **Deborah Gérard<sup>1</sup>, Florian Schmidt<sup>2,3</sup>, Aurélien Ginolhac<sup>1</sup>, Martine Schmitz<sup>1</sup>,**  
5     **Rashi Halder<sup>4</sup>, Peter Ebert<sup>3</sup>, Marcel H. Schulz<sup>2,3</sup>, Thomas Sauter<sup>1</sup> and Lasse**  
6                     **Sinkkonen<sup>1\*</sup>**

7     <sup>1</sup>Life Sciences Research Unit, University of Luxembourg, L-4367 Belvaux,  
8     Luxembourg

9     <sup>2</sup>Excellence Cluster for Multimodal Computing and Interaction, Saarland Informatics  
10    Campus, Germany

11    <sup>3</sup>Computational Biology & Applied Algorithmics, Max Planck Institute for  
12    Informatics, Saarland Informatics Campus, Germany

13    <sup>4</sup>Luxembourg Centre for Systems Biomedicine, University of Luxembourg, Esch-sur-  
14    Alzette, L-4362, Luxembourg

15

16    [Deborah.Gerard@uni.lu](mailto:Deborah.Gerard@uni.lu); [fschmidt@mmci.uni-saarland.de](mailto:fschmidt@mmci.uni-saarland.de); [Aurelien.Ginolhac@uni.lu](mailto:Aurelien.Ginolhac@uni.lu);

17    [Martine.Schmitz@uni.lu](mailto:Martine.Schmitz@uni.lu); [Rashi.Halder@uni.lu](mailto:Rashi.Halder@uni.lu); [pebert@mpi-inf.mpg.de](mailto:pebert@mpi-inf.mpg.de);

18    [mschulz@mmci.uni-saarland.de](mailto:mschulz@mmci.uni-saarland.de); [Thomas.Sauter@uni.lu](mailto:Thomas.Sauter@uni.lu); [Lasse.Sinkkonen@uni.lu](mailto:Lasse.Sinkkonen@uni.lu)

19

20    \***Corresponding author:** Dr. Lasse Sinkkonen

21                     Life Sciences Research Unit, University of Luxembourg

22                     6, Avenue du Swing, L-4367 Belvaux, Luxembourg

23                     Tel.: +352-4666446839

24                     E-mail: [lasse.sinkkonen@uni.lu](mailto:lasse.sinkkonen@uni.lu)

25

1 **ABSTRACT**

2 Temporal data on gene expression and context-specific open chromatin states can  
3 improve identification of key transcription factors (TFs) and the gene regulatory  
4 networks (GRNs) controlling cellular differentiation. However, their integration  
5 remains challenging. Here, we delineate a general approach for data-driven and  
6 unbiased identification of key TFs and dynamic GRNs, called EPIC-DREM. We  
7 generated time-series transcriptomic and epigenomic profiles during differentiation of  
8 mouse multipotent bone marrow stromal cells (MSCs) towards adipocytes and  
9 osteoblasts. Using our novel approach we constructed time-resolved GRNs for both  
10 lineages. To prioritize the identified shared regulators, we mapped dynamic super-  
11 enhancers in both lineages and associated them to target genes with correlated  
12 expression profiles. We identified aryl hydrocarbon receptor (AHR) as a  
13 mesenchymal key TF controlled by a dynamic cluster of MSC-specific super-  
14 enhancers that become repressed in both lineages. AHR represses differentiation-  
15 induced genes such as *Notch3* and we propose AHR to function as a guardian of  
16 mesenchymal multipotency.

17

18

19

20

21

22 **Keywords:** gene regulatory network / epigenomics / super-enhancer /  
23 mesenchymal differentiation / AHR / adipocyte / osteoblast /  
24 Notch signaling /

## 1 INTRODUCTION

2 Understanding the gene regulatory interactions underlying cell differentiation and  
3 identity has become increasingly important, especially in regenerative medicine.  
4 Efficient and specific reprogramming of cells towards desired differentiated cell types  
5 relies on understanding of the cell type-specific regulators and their targets (Rackham  
6 et al., 2016). Similarly, knowledge of the regulatory wiring in the intermediate stages  
7 might allow controlled partial dedifferentiation, and thereby endogenous regeneration,  
8 also in mammals (Aguirre et al., 2014).

9 Great progress has been made in reconstruction of GRNs for various cell types in  
10 recent years. While successful, many of the approaches derive their regulatory  
11 interactions from existing literature and databases, which may be limiting as the  
12 majority of enhancers harboring transcription factor (TF) binding sites are cell type-  
13 specific (Consortium et al., 2014). Thus, the regulatory interactions derived from  
14 existing databases and literature might be misleading and are likely to miss important  
15 interactions that have not been observed in other cell types. Therefore, context-  
16 specific expression data have been used to overcome such biases and allow a data-  
17 driven network reconstruction (Janky et al., 2014). In addition, other approaches  
18 taking advantage of time-series data, such as Dynamic Regulatory Events Miner  
19 (DREM) (Schulz et al., 2012), have been developed to allow hierarchical  
20 identification of the regulatory interactions. However, while time-series epigenomic  
21 data has been used in different studies to derive time point-specific GRNs (Ramirez et  
22 al., 2017) (Goode et al., 2016), systematic approaches that integrate the different types  
23 of data in an intuitive and automated way are missing.

24 The central key genes of biological networks under multi-way regulation by many  
25 TFs and signaling pathways were recently shown to be enriched for disease genes and

Gerard *et al.*: Time-series epigenomic profiles of mesenchymal differentiation

1 are often controlled through so called super-enhancers (SEs), large regulatory regions  
2 characterized by broad signals for enhancer marks like H3 lysine 27 acetylation  
3 (H3K27ac) (Galhardo et al., 2015) (Hnisz et al., 2013) (Parker et al., 2013) (Siersbaek  
4 et al., 2014). Hundreds of SEs can be identified per cell type, many of which are cell  
5 type- or lineage-specific and usually control genes that are important for the identity  
6 of the given cell type or condition. Thus, SE mapping can facilitate unbiased  
7 identification of novel key genes.

8 An example of lineage specification events with biomedical relevance is the  
9 differentiation of multipotent bone marrow stromal progenitor cells (MSCs) towards  
10 two mesenchymal cell types: osteoblasts and bone marrow adipocytes. Due to their  
11 shared progenitor cells, there is a reciprocal balance in the relationship between  
12 osteoblasts and bone marrow adipocytes. Proper osteoblast differentiation and  
13 maturation towards osteocytes is important in bone fracture healing and osteoporosis  
14 and osteoblast secreted hormones like osteocalcin can influence insulin resistance  
15 (Lee et al., 2007) (Silva & Kousteni, 2012). At the same time bone marrow  
16 adipocytes, that occupy as much as 70% of the human bone marrow (Fazeli et al.,  
17 2013), are a major source of hormones promoting metabolic health, including insulin  
18 sensitivity (Cawthorn et al., 2014). Moreover, increased commitment of the MSCs  
19 towards the adipogenic lineage upon obesity and aging was recently shown to inhibit  
20 both bone healing and the hematopoietic niche (Ambrosi et al., 2017).

21 Extensive temporal epigenomic analysis of osteoblastogenesis has been recently  
22 reported (Wu et al., 2017). However, a parallel investigation of two lineages  
23 originating from the same progenitor cells can help to understand both the lineage-  
24 specific and the shared regulators important for their (de)differentiation. To identify  
25 shared regulators of adipocyte and osteoblast commitment and to delineate a general

Gerard *et al.*: Time-series epigenomic profiles of mesenchymal differentiation

1 approach for systematic unbiased identification of key regulators, we performed time-  
2 series epigenomic and transcriptomic profiling at 6 different time points over 15 day  
3 differentiation MSCs towards both lineages. We combine segmentation-based TF  
4 binding predictions from time point-specific active enhancer data (Schmidt et al.,  
5 2017) with probabilistic modeling of temporal gene expression data (Schulz et al.,  
6 2012) to derive dynamic GRNs for both lineages. By merging overlapping SEs  
7 identified using H3K27ac signal from different time points we obtained dynamic  
8 profiles of SE activity across the two differentiations and use these dynamic SEs to  
9 prioritize the key regulators identified through the network reconstruction. With this  
10 approach, we identify aryl hydrocarbon receptor (AHR) as a central regulator of  
11 multipotent MSCs under dynamic control from 4 adjacent SEs that become repressed  
12 in the differentiated cells. The AHR repression allows upregulation of many  
13 adipocyte- and osteoblast-specific genes, including *Notch3*, a conserved  
14 developmental regulator.

15

16

## RESULTS

### 17 **A subset of differentially expressed genes are shared between adipocyte and** 18 **osteoblast differentiation**

19 To identify shared regulators of MSC differentiation towards adipocytes and  
20 osteoblasts, and to delineate a general approach for a systematic unbiased  
21 identification of key regulators, we performed time-series ChIP-seq and RNA-seq  
22 profiling at 6 different time points over 15 days of differentiation of mouse ST2  
23 MSCs (Figure 1A). Using ChIP-seq, genome-wide profiles of three different histone  
24 modifications, indicating active transcription start sites (TSS) (H3K4me3), active  
25 enhancers (H3K27ac), and on-going transcription (H3K36me3) were generated.

Gerard *et al.*: Time-series epigenomic profiles of mesenchymal differentiation

1 These data were complemented by corresponding time-series RNA-seq analysis.  
2 Importantly, at genome-wide level all the histone modifications showed good  
3 correlation with the RNA-seq data across the time points (Pearson correlation co-  
4 efficients of approximately 0.5), further arguing for the reproducibility of the obtained  
5 results (Becker *et al.* in preparation). The successful differentiations were confirmed  
6 by induced expression of known lineage-specific marker genes and microscopic  
7 inspection of cellular morphology and stainings (Supplementary Figure S1).  
8 Interestingly, profiles of the adipogenic marker genes resembled those reported for the  
9 yellow adipose tissue (YAT) found in the bone marrow, rather than classic white  
10 adipose tissue (WAT) (Scheller et al., 2016), consistent with ST2 cells originating  
11 from bone marrow stroma (Figure S1A). Moreover, the expression profiles of *Sp7* and  
12 *Runx2* were consistent to those previously reported for mouse osteoblasts (Yoshida et  
13 al., 2012).

14 Principal component analysis of the obtained transcriptome profiles confirmed the  
15 specification of the cells towards two different lineages with differential temporal  
16 dynamics (Figure 1B). Osteoblastogenesis was accompanied by gradual and  
17 consistent progression towards a more differentiated cell type while adipogenesis  
18 showed more complex dynamics with a big transcriptome shift after one day of  
19 differentiation, followed by a more gradual progression during the following days.  
20 This is in keeping with the change in the composition of the differentiation medium  
21 from day 2 onwards (see Methods for details). In total the adipocyte differentiation  
22 was characterized by 5156 significantly differentially expressed genes ( $\log_2FC \geq 1$ ,  
23  $FDR < 0.05$ ) compared to the MSCs (Figure 1C; Supplementary Table S1). During  
24 osteoblast differentiation 2072 genes were differentially expressed. 1401 of these  
25 genes were affected in both lineages. However, as illustrated by the top 100 genes

Gerard *et al.*: Time-series epigenomic profiles of mesenchymal differentiation

1 with highest variance across the time points and depicted in the heatmap in Figure 1D,  
2 most genes exhibit either lineage-specific or opposing behavior between the lineages.  
3 Only a subset of genes showed similar changes in both lineages (Figure 1D), thus,  
4 narrowing the list of genes that could serve as shared regulators of both differentiation  
5 or dedifferentiation processes.

6

7 **Unbiased data-driven derivation of context-specific dynamic regulatory**  
8 **networks of adipocyte and osteoblast differentiation using EPIC-DREM**

9 In order to take an unbiased and data-driven approach that can benefit from the time  
10 series profiles, we have developed a new method to predict condition-specific TF  
11 binding using footprint calling in H3K27ac data and TF motif annotation (Gusmao et  
12 al., 2016) (Roeder et al., 2007) (Schmidt et al., 2017). Our approach uses a novel  
13 randomization strategy, which accurately accounts for differences in footprint lengths  
14 and GC-content bias, to assess the significance of TF binding affinity values for each  
15 condition or time point (Figure 2). These time point-specific predictions can be  
16 combined with the DREM approach (Schulz et al., 2012) to construct lineage-specific  
17 networks that are supported by epigenetics data (called EPIC-DREM, Figure 2).

18 At first we have used 78 TF ChIP-seq datasets from three ENCODE cell lines  
19 (GM12878, HepG2, and K562) to test the ability of our approach to prioritize  
20 condition-specific TF binding sites using this pipeline. Using a  $p$ -value cutoff  $< 0.05$   
21 we obtained accurate cell-type specific TF binding predictions with a median  
22 precision of  $\sim 70\%$  without a major decrease in recall (Supplementary Figure S2) and,  
23 thus, used the same cut-off for our time-series differentiation data.

Gerard *et al.*: Time-series epigenomic profiles of mesenchymal differentiation

1 We applied EPIC-DREM to the analysis for each timepoint of the two differentiation  
2 time series. Depending on the time point and lineage we predicted 0.6 to 1.4 million  
3 footprints per time point, consistent with previous reports on the presence of  
4 approximately 1.1 million DNase-seq footprints per cell type (Neph et al., 2012).  
5 These footprints were annotated with TFs that show expression in the differentiation  
6 series and associated to genes within 50 kb to obtain the TF scores per gene and per  
7 time point (see Methods and Figure 2). The full matrix of the time point-specific TF-  
8 target gene interactions per lineage can be downloaded at (Gerard et al., 2017).

9 The derived matrix of the predicted time point-specific TF-target gene interactions  
10 was combined with the time series gene expression data to serve as input for DREM  
11 to identify bifurcation events, where genes split into paths of co-expressed genes  
12 (Figure 2 and 3). Knowing the time point-specific TF-target gene interactions allows  
13 to associate split points and paths with the key TFs regulating them. Figure 3 shows  
14 the split points and the paths of co-expressed genes identified for adipocyte (Figure  
15 3A) and osteoblast (Figure 3B) differentiation. The total number of TFs controlling  
16 the individual paths are indicated with the top TFs per path listed (based on their fold  
17 change (FC) and split score; see Supplementary Table S2 for all TFs per split).

18 Inspection of the identified key TFs confirmed many known positive (e.g. CEBPA,  
19 CEBPB, PPARG, and STAT5A/STAT5B) and negative (e.g. HES1 and GATA2)  
20 regulators of adipocyte differentiation (Farmer, 2006), to be among the TFs  
21 controlling the genes in the induced paths, while becoming up- or down-regulated  
22 themselves, respectively (Figure 3A). Interestingly, while not changing in their  
23 expression, TFs like E2F4 were annotated among those with highest split score during  
24 the first day of adipogenesis, consistently with E2F4's role as early repressor of  
25 adipogenesis whose activity is controlled by its co-repressor p130 (Farmer, 2006). At



Gerard *et al.*: Time-series epigenomic profiles of mesenchymal differentiation

1 the same time E2F7 and E2F8 seem to be associated with regulation of genes first  
2 repressed at early adipogenesis, and then upregulated during the following days  
3 (Figure 3A).

4 The results of the regulatory network of osteoblastogenesis confirms many known  
5 regulators such as DLX3 (Hassan et al., 2004) , DDIT3 (CHOP) (Shirakawa et al.,  
6 2006), ATF4, and FOXO1 (Long, 2011), while revealing many other factors that have  
7 not been previously associated to osteoblast differentiation (Figure 3B).

8 The analysis identified several TFs that could play a role in both lineages. In keeping  
9 with previous findings using the same ST2 cell line, ID4 was identified by EPIC-  
10 DREM as an activator of upregulated genes during osteoblastogenesis, while in  
11 adipocytes ID4 was controlling downregulated genes, thereby favouring the osteoblast  
12 lineage (Tokuzawa et al., 2010). Among other TFs implicated in several different  
13 splits in both lineages we found for example VDR, GLIS1, ARNT2 and AHR.

14 Taken together, the EPIC-DREM approach can identify many known key regulators  
15 of adipocyte and osteoblast differentiation and predicts additional novel regulators  
16 and the bifurcation events they control in an entirely unbiased manner relying only on  
17 the available time series data.

18

### 19 **Identification of dynamic SEs in adipocyte and osteoblast differentiation**

20 While EPIC-DREM can efficiently identify many of the main regulators of the  
21 differentiation time courses, it still yields a list of tens of TFs. In order to further  
22 prioritize the identified main regulators, we hypothesized that the key TFs of the  
23 differentiation processes would be controlled by SEs with dynamic profiles. To obtain  
24 such profiles of SEs across time points, we first identified all SEs with a width of at

Gerard *et al.*: Time-series epigenomic profiles of mesenchymal differentiation

1 least 10 kb separately in each of the 10 H3K27ac ChIP-seq data sets from the two  
2 time courses. Next, to allow a quantification of the SE signals across time while also  
3 accounting for the changes in the width of the SEs, we combined all SEs from all time  
4 points with at least 1 nucleotide overlap into one broader genomic region, called a  
5 merged SE. Figure 4A illustrates how the 49 SEs found at the *Cxcl12* locus,  
6 producing a chemokine essential for maintenance of the hematopoietic stem cells  
7 (HSCs) (Ambrosi et al., 2017), can be combined into one exceptionally large merged  
8 SE region that enables the quantification of the SE signal across the time. The  
9 normalized read counts under the merged SE region were collected and the relative  
10 SE signals normalized to D0 are shown in Figure 4B. To confirm that the obtained  
11 profile is a reasonable estimate of the SE activity and to see whether it could indeed  
12 be regulating the *Cxcl12* gene expression, we compared the SE signal profiles to the  
13 *Cxcl12* mRNA profiles. As shown in Figure 4B, in both lineages the SE signal closely  
14 followed the mRNA expression profile with Pearson correlation coefficients of 0.83  
15 and 0.89, respectively. Moreover, similar correlations could be seen for most other  
16 identified merged SEs, further confirming the applicability of our approach.

17 In total, we identified 1052 merged SEs across the two lineages (Supplementary Table  
18 S3). 120 and 79 merged SEs showed a dynamic profile ( $\log_2FC \geq 1$  in at least one time  
19 point) in adipocyte and osteoblast differentiation, respectively (Figure 4C-4E).  
20 Consistent with the different dynamics in transcriptomic changes (Figure 1), the  
21 adipocyte SEs could be divided into four separate main profiles based on their  
22 dynamics (Figure 4C; Supplementary Figure S3) while most osteoblast SEs could be  
23 assigned into one of two simple profiles that either increase or decrease in signal over  
24 time (Figure 4D).

Gerard *et al.*: Time-series epigenomic profiles of mesenchymal differentiation

1 25 dynamic SEs showed changes in both differentiation processes (Figure 4E). Based  
2 on the proximity, presence of H3K4me3-marked TSSs and correlation with the  
3 expression profiles, these SEs could be assigned to 18 separate genes, several of  
4 which have already been implicated in MSCs or cell types derived from them (Figure  
5 4E) (e.g. (Ambrosi et al., 2017) (Gu et al., 2007) (Cui et al., 2007)). However, only  
6 three of the genes, *aryl hydrocarbon receptor (Ahr)*, *GLIS family zinc finger 1 (Glis1)*,  
7 and *Meningioma 1 (Mn1)*, encode TFs and could serve as central nodes in GRNs.  
8 Interestingly, both AHR and GLIS1 were already predicted by EPIC-DREM as  
9 regulators of multiple bifurcation events in both lineages (Figure 3), while MN1 motif  
10 is not included in the motif collection currently used by EPIC-DREM. Moreover, *Ahr*  
11 is associated with four separate merged SEs, more than any other TF in our analysis.  
12 Therefore, we next focused on *Ahr* regulation.

13

14 ***Ahr* is controlled by multiple SEs in MSCs and repressed with lineage-specific**  
15 **dynamics**

16 The four adjacent merged SEs (SE<sub>283</sub>, SE<sub>284</sub>, SE<sub>285</sub>, and SE<sub>286</sub>) at *Ahr* locus together  
17 cover a continuous region over 300 kb of active enhancer signal downstream of the  
18 *Ahr* gene in the MSCs (Figure 5A and 5B). All four SE regions follow similar  
19 dynamics across the time points (Figure 5A-5D) although SE<sub>283</sub> did not pass the FC  
20 cut-off in the initial analysis in Figure 4. Moreover, all four SEs showed a very high  
21 correlation ( $r \geq 0.95$ ) with *Ahr* mRNA levels as measured by RNA-seq (Figure 5C-5D,  
22 upper panels) and validated by RT-qPCR (Figure 5C-5D, lower panels). In  
23 adipogenesis *Ahr* expression is repressed already by D1 and remains repressed  
24 throughout the differentiation. Similarly, the signal from all SE regions is becoming  
25 reduced already after 1 day. In contrast in osteoblasts, the SE regions first show an

Gerard *et al.*: Time-series epigenomic profiles of mesenchymal differentiation

1 increase in signal on D1, followed by gradual reduction from D3 onwards, consistent  
2 with the *Ahr* mRNA levels. Finally, in both lineages the repression is accompanied by  
3 a decreased signal of H3K36me3 in the gene body of *Ahr*, confirming repression at  
4 transcriptional level.

5 While the newly identified SE cluster at the *Ahr* locus is also flanked by another  
6 active gene, *Snx13*, it is unlikely that the SEs contribute to its regulation; during the  
7 differentiations *Snx13* shows very few changes in its expression or H3K36me3 signal  
8 (Figure 5A-5B and data not shown). Moreover, inspection of Hi-C data of  
9 surrounding the *Ahr* locus in different mouse cell types indicates that *Ahr* and the four  
10 SEs are located in their own topological domain (TAD) separate from the *Snx13* gene  
11 (Supplementary Figure S4) ("The 3D Genome Browser,").

12 Interestingly, the SEs controlling *Ahr* appear to be specific for the multipotent MSCs  
13 as only weak H3K27ac signal could be detected in the corresponding genomic region  
14 in mouse 3T3-L1 pre-adipocytes that are more committed towards the white  
15 adipocyte lineage (Figure 5E, (Mikkelsen et al., 2010)). Importantly, the large SE  
16 domains downstream of the *Ahr* gene could be identified also in human MSCs, but  
17 not in other inspected human cell types, suggesting that the complex regulation of *Ahr*  
18 expression in these multipotent cells could be conserved and relevant also in human  
19 development (Supplementary Figure S5).

20

21 **AHR regulates mesenchymal multipotency through repression of lineage-specific**  
22 **genes such as Notch3**

23 Based on the above results, we reasoned that *Ahr* could play an important role in  
24 maintaining MSCs in a multipotent state. Indeed, previous work has separately shown

Gerard *et al.*: Time-series epigenomic profiles of mesenchymal differentiation

1 that both adipogenesis and osteoblastogenesis can be inhibited by toxic compounds  
2 like dioxin that are xenobiotic ligands of AHR (Alexander et al., 1998). (Naruse et al.,  
3 2002), (Korkalainen et al., 2009).

4 While AHR is best known for its role as a xenobiotic receptor, it has been recently  
5 suggested that it could also play a role in stem cell maintenance in HSCs under the  
6 control of endogenous ligands (Gasiewicz, Singh, & Bennett, 2014). We therefore  
7 tested whether the endogenous activity of AHR is important for the maintenance of  
8 the appropriate transcriptional program of the MSCs by knocking down AHR in  
9 undifferentiated cells, or those differentiated for one day towards either lineage  
10 (Figure 6A, Supplementary Figure S6). Two days following the KD total RNA was  
11 extracted and subjected to RNA-seq analysis.

12 At first, we took advantage of these context-specific KD data to ask whether the  
13 EPIC-DREM predicted primary AHR targets at the corresponding time points were  
14 indeed affected by depletion of AHR. As shown in Figure 6B, at each condition the  
15 predicted AHR targets were significantly more affected by AHR-KD than all genes on  
16 average. Especially the top genes with highest affinity scores for AHR regulation,  
17 were clearly shifted towards more upregulation at each condition, arguing for  
18 functional relevance of the EPIC-DREM predictions and for AHR's role as  
19 transcriptional repressor.

20 The number of genes significantly affected by the AHR-KD compared to the  
21 respective control siRNA transfections was greatly dependent on the cellular  
22 condition and ranged from 614 genes in the undifferentiated cells to 722 and 1819  
23 genes in the one day differentiated osteoblasts and adipocytes, respectively (Figure  
24 6B-6D, Supplementary Table S4). The higher extent of genes affected in the  
25 differentiated cells, and especially in the adipocyte lineage, is well in keeping with the

Gerard *et al.*: Time-series epigenomic profiles of mesenchymal differentiation

1 ratio of genes normally changing in the early osteoblasto- and adipogenesis. This  
2 suggests that early changes induced by the knock-down in the undifferentiated cells  
3 are amplified in the differentiating cells. To further elucidate the role of AHR in the  
4 undifferentiated cells, we asked how the genes deregulated were behaving later in the  
5 normally differentiated D15 adipocytes and osteoblasts. The scatter plots in Figure 6C  
6 indicate the transcriptome changes taking place upon AHR-KD in MSCs compared to  
7 changes of the same genes in the differentiated cell types. As indicated by the colour  
8 coding, approximately half of the genes affected by AHR-KD were also differentially  
9 expressed after normal differentiation (286 in adipocytes and 314 in osteoblasts).  
10 Moreover, genes that were upregulated in AHR-KD were also often induced in the  
11 differentiated cell types (Figure 6C). Therefore AHR might serve as a guardian of the  
12 multipotent state in the undifferentiated cells, with its downregulation allowing  
13 increased expression of the lineage-specific genes, as already suggested by the EPIC-  
14 DREM analysis (Figure 3).

15 To better understand the function of putative AHR target genes in the MSCs, we  
16 overlapped the differentially expressed genes from the undifferentiated cells with  
17 those identified in the two other KD experiments and obtained 266 high-confidence  
18 target genes that were affected in all three conditions (Figure 6D). Enrichment  
19 analysis for tissue-specific expression profiles of these genes in human and mouse  
20 gene atlas databases revealed smooth muscle, adipocytes, and osteoblasts as the most  
21 enriched cell types, where the AHR regulated genes are normally expressed (Figure  
22 6E). Consistently, inspection of publicly available ChIP-seq data from various cell  
23 types revealed the other regulators of the AHR targets to include CEBPB, PPARG,  
24 and NR1H3, all of which are important regulators involved in induction of genes  
25 during adipocyte differentiation (Galhardo et al., 2014) (Nielsen et al., 2008) .

Gerard *et al.*: Time-series epigenomic profiles of mesenchymal differentiation

1 Taken together, the above findings support a role for AHR as a regulator of lineage-  
2 specific genes that need to remain repressed in the multipotent MSCs. Among such  
3 genes induced upon AHR-KD we identified *Notch3*, a known regulator of cellular  
4 differentiation (Bray, 2016) (Figure 6C). In both differentiation time courses *Notch3*  
5 expression showed an anti-correlating profile compared *Ahr*, with *Notch3* becoming  
6 induced while *Ahr* levels decreased (Figure 6F). The *Notch3* induction was also  
7 accompanied by increased *Notch4* levels in both lineages while the third abundantly  
8 expressed receptor, *Notch1*, was concomitantly downregulated (Supplementary Figure  
9 S6). Thus, it appears that a reprogramming of Notch signaling could be involved in  
10 the commitment of MSCs and this rewiring is at least partially under AHR-mediated  
11 control.

12

13

## DISCUSSION

14 The ability to obtain unbiased GRNs and to identify their key nodes for any given cell  
15 state transition in a data-driven manner is becoming increasingly relevant for  
16 regenerative and personalized medicine. Understanding such dynamic networks can  
17 be improved by obtaining genome-wide time-series data sets such as transcriptomics  
18 or epigenomics data. To seamlessly integrate such data sets we have combined time  
19 point-specific high accuracy TF binding predictions with probabilistic modeling of  
20 temporal gene expression data and applied it to our own time-series data from  
21 mesenchymal differentiation (Figure 2 and Figure 3). Similar time series data  
22 collections have previously been used to study for example hematopoiesis (Goode et  
23 al., 2016) and myeloid differentiation (Ramirez et al., 2017). However, the derived  
24 dynamic GRNs have relied on experimentally identified TF binding sites, that cover

Gerard *et al.*: Time-series epigenomic profiles of mesenchymal differentiation

1 only a fraction of all TF-target gene interactions, or on a sub-network of selected TF-  
2 TF interactions, respectively.

3 EPIC-DREM can reveal the key TFs controlling co-expressed gene sets of interest.  
4 Still, consistent with the co-operative nature of TF activity (Siersbaek et al., 2014),  
5 the number of putative master regulators is often very large. Recent work elucidating  
6 the role of SEs in controlling cell type-specific master regulators has provided  
7 researchers with a new tool for data-driven identification of such regulators (Hnisz et  
8 al., 2013) (Parker et al., 2013). We hypothesized that merged SEs with dynamic  
9 behavior during differentiation based on their H3K27ac signal would allow finding  
10 the genes, including the TFs, most relevant for the dynamic process. Indeed,  
11 quantification of merged SEs shows high correlation with expression levels of their  
12 target genes over time, both validating the approach and allowing for more accurate  
13 association of SEs to their target genes (Figure 4). A recent study applied a similar  
14 strategy for SE quantification and further showed that SE dynamics, as measured by  
15 MED1 occupancy, were predictive of enhancer looping to target genes, and  
16 highlighted H3K27ac as the histone modification that best predicted such loop  
17 dynamics, further supporting the validity of our approach (Siersbaek et al., 2017).

18 Combining EPIC-DREM results and dynamic SE profiling points towards two TFs  
19 with potentially significant roles in both lineages, *Ahr* and *Glis1* (Figure 4). In  
20 addition, dynamic SE profiling supports a role for *Mn1*. Both *Ahr* and *Glis1*, and their  
21 SEs, show an overall reduction in signal during both differentiations, although with  
22 differential and lineage-specific dynamics (Figure 5 and data not shown), suggesting  
23 that they could play an important role in maintaining MSCs. On contrary, the SE  
24 downstream of *Mn1* shows an increase in its signal in both lineages (data not shown),  
25 suggesting it could be a general driver of differentiation. Indeed, MN1 has already



Gerard *et al.*: Time-series epigenomic profiles of mesenchymal differentiation

1 been shown to be targeted by VDR in osteoblasts and to be required for proper  
2 osteoblast differentiation (Meester-Smoor et al., 2005; Sutton et al., 2005; X. Zhang et  
3 al., 2009). Our results suggest a similar role also in adipocytes.

4 GLIS1 has not been functionally associated to adipocyte or osteoblast differentiation  
5 although recent work has implicated it as differentially expressed in brown adipocyte  
6 differentiation (Pradhan et al., 2017). However, consistent with a potential role in the  
7 multipotent progenitors, GLIS1 has been shown capable of promoting reprogramming  
8 of fibroblasts to induced pluripotent stem cells (iPSCs) (Maekawa et al., 2011).  
9 Further work will be needed to elucidate the role of GLIS1 in MSCs.

10 Unlike for GLIS1 and MN1, previous work has already linked AHR separately to  
11 inhibition of both adipocyte and osteoblast differentiation through studies on  
12 biological impact of dioxin, an environmental toxin capable of activating AHR  
13 (Alexander et al., 1998), (Naruse et al., 2002), (Korkalainen et al., 2009). In 3T3-L1  
14 adipocytes this inhibition is known to be mediated through overexpression of *Ahr* in a  
15 dioxin-independent manner (Shimb et al., 2001), while increased levels of *Ahr*  
16 expression in MSCs in rheumatoid arthritis are inhibitory of osteogenesis (Tong et al.,  
17 2017). Still, the biological function of AHR in the MSCs has remained unclear while  
18 maintenance of HSCs, located in the same niche of bone marrow with MSCs, has  
19 been suggested to depend on the normal function of AHR (Gasiewicz et al., 2014).  
20 Moreover, as HSC maintenance also depends on the cytokines and chemokines  
21 provided by the MSCs, AHR is likely to impact HSCs through its gene regulatory  
22 functions in both MSCs and HSCs (Ambrosi et al., 2017) (Boitano et al., 2010)  
23 (Jensen et al., 2003).

24 Here we show that repression of *Ahr* in MSC differentiation happens with lineage-  
25 specific dynamics and is accompanied by similar reduction in signal of an

Gerard *et al.*: Time-series epigenomic profiles of mesenchymal differentiation

1 exceptionally large SE cluster downstream of *Ahr*. Together *Ahr* and the SEs form  
2 their own TAD in mouse cells and in human cells the SE signal is specific for MSCs.  
3 Analysing the contributions of the different constituents of the *Ahr*-SEs will be  
4 important for understanding which pathways converge to regulate *Ahr* in MSCs and  
5 whether they function in a synergistic manner as suggested for some other large SEs  
6 (Hnisz *et al.*, 2015) (Dukler *et al.*, 2016).

7 AHR depletion in the undifferentiated and early stage differentiated cells confirmed  
8 many of the EPIC-DREM predictions but also revealed an enrichment for lineage-  
9 specific genes among AHR targets, including *Notch3* (Figure 6). Notch signaling has  
10 been implicated in numerous developmental processes with highly diverse outcomes  
11 (Bray, 2016) and also in MSCs *Notch3* regulation is accompanied by changes in other  
12 *Notch* genes (Supplementary Figure S6). Interestingly, AHR has been recently linked  
13 to regulation of Notch signaling in mouse lymphoid cells and testis (Lee *et al.*, 2011)  
14 (Huang *et al.*, 2016). However, the affected Notch receptors varied depending on the  
15 cell type in question. *Notch* genes show different expression profiles across tissues  
16 and cell types and *Ahr*-mediated regulation of Notch signaling could be context-  
17 specific depending on the prevailing GRN or chromatin landscape. Curiously, *Notch3*  
18 has a cell type-selective expression profile, favouring mesenchymal tissues like bone,  
19 muscle and adipose tissue (Wu *et al.*, 2016).

20 Our approach for identification of the dynamic GRNs and SEs allows key regulator  
21 identification in various time series experiments involving cell state changes. Our  
22 current results together with previous data identify AHR as a likely guardian of  
23 mesenchymal multipotency and provide an extensive resource for further analyses of  
24 mesenchymal lineage commitment.

25

1 **METHODS**

2 **Cell culture**

3 The mouse MSC line ST2, established from Whitlock-Witte type long-term bone  
4 marrow culture of BC8 mice (Ogawa et al., 1988), was used during all experiments.  
5 Cells were grown in Roswell Park Memorial Institute (RPMI) 1640 medium (Gibco,  
6 Life Technologies, 32404014) supplemented with 10% fetal bovine serum (FBS)  
7 (Gibco, Life Technologies, 10270-106, lot #41F8430K) and 1% L-Glutamine (Lonza,  
8 BE17-605E) in a constant atmosphere of 37°C and 5 % CO<sub>2</sub>. For differentiation into  
9 adipocytes and osteoblasts, ST2 cells were seeded 4 days before differentiation (day-  
10 4), reached 100% confluency after 48 hours (day-2) and were further maintained for  
11 48 hours post-confluency (day 0). Adipogenic differentiation was subsequently  
12 initiated on day 0 (D0) by adding differentiation medium I consisting of growth  
13 medium, 0.5 mM isobutylmethylxanthine (IBMX) (Sigma-Aldrich, I5879), 0.25 µM  
14 dexamethasone (DEXA) (Sigma-Aldrich, D4902) and 5 µg/mL insulin (Sigma-  
15 Aldrich, I9278). From day 2 (D2) on differentiation medium II consisting of growth  
16 medium, 500 nM rosiglitazone (RGZ) (Sigma-Aldrich, R2408) and 5 µg/mL insulin  
17 (Sigma-Aldrich, I9278) was added and replaced every 2 days until 15 days of  
18 differentiation. Osteoblastic differentiation was induced with growth medium  
19 supplemented with 100 ng/mL bone morphogenetic protein-4 (BMP-4) (PeproTech,  
20 315-27). Same media was replaced every 2 days until 15 days of osteoblastogenesis.

21

22 **Gene silencing**

23 Undifferentiated ST2 cells (day-1) were transfected with Lipofectamine RNAiMAX  
24 (Life Technologies, 13778150) according to manufacturer's instructions using 50 nM

Gerard *et al.*: Time-series epigenomic profiles of mesenchymal differentiation

1 of gene-specific siRNAs against mouse *Ahr* (*siAhr*) (Dharmacon, M-044066-01-0005)  
2 or 50 nM of a negative control siRNA duplexes (*siControl*) Dharmacon, D-001206-  
3 14-05). Cells were collected 48 h post-transfection. Sequences of the siRNAs are  
4 listed in Supplementary Table S5.

5

6

### Western blotting

7 After a washing step of the cells with 1x PBS, and addition of 1x Lämmli buffer, the  
8 lysates were vortexed and the supernatants were heated at 95°C for 7 minutes.  
9 Proteins were subjected to SDS-PAGE (10% gel) and probed with the respective  
10 antibodies. The following antibodies were used: anti-AHR (Enzo Life Biosciences,  
11 BML-SA210-0025), anti-ACTIN (Merck Millipore, MAB1501). HRP-conjugated  
12 secondary antibodies were purchased from Cell Signaling. Signals were detected on a  
13 Fusion FX (Vilber Lourmat) imaging platform, using an ECL solution containing 2.5  
14 mM luminol, 100 mM Tris/HCl pH 8.8, 0.2 mM para-coumaric acid, and 2.6 mM  
15 hydrogenperoxide.

16

17

### RNA extraction and cDNA synthesis

18 Total RNA was extracted from ST2 cells using TRIsure (Bioline, BIO-38033).  
19 Medium was aspirated and 1000 µL of TRIsure was added to 6-wells. To separate  
20 RNA from DNA and proteins, 200 µL of chloroform (Carl Roth, 6340.1) was added.  
21 To precipitate RNA from the aqueous phase, 400 µL of 100% isopropanol (Carl Roth,  
22 6752.4) was added and RNA was incubated at -20°C overnight. cDNA synthesis was  
23 done using 1 µg of total RNA, 0.5 mM dNTPs (ThermoFisher Scientific, R0181), 2.5  
24 µM oligo dT-primer (Eurofins MWG GmbH, Germany), 1 U/µL Ribolock RNase

Gerard *et al.*: Time-series epigenomic profiles of mesenchymal differentiation

1 inhibitor (ThermoFisher Scientific, EO0381) and 1 U/ $\mu$ L M-MuLV Reverse  
2 transcriptase (ThermoFisher Scientific, EP0352) for 1h at 37°C or 5 U/ $\mu$ L RevertAid  
3 Reverse transcriptase for 1 h at 42°C. The PCR reaction was stopped by incubating  
4 samples at 70°C for 10 minutes.

5

6

### Quantitative PCR

7 Real-time quantitative PCR (qPCR) was performed in an Applied Biosystems 7500  
8 Fast Real-Time PCR System and using Thermo Scientific Absolute Blue qPCR  
9 SYBR Green Low ROX Mix (ThermoFisher Scientific, AB4322B). In each reaction 5  
10  $\mu$ L of cDNA, 5  $\mu$ L of primer pairs (2  $\mu$ M) and 10  $\mu$ L of the Absolute Blue qPCR mix  
11 were used. The PCR reactions were carried out at the following conditions: 95°C for  
12 15 minutes followed by 40 cycles of 95°C for 15 seconds, 55°C for 15 seconds and  
13 72°C for 30 seconds. To calculate the gene expression level the  $2^{-(\Delta\Delta Ct)}$  method were  
14 used where  $\Delta\Delta Ct$  is equal to  $(\Delta Ct_{(target\ gene)} - \Delta Ct_{(housekeeping\ gene)})_{tested\ condition} - (\Delta Ct_{(target\ gene)} - \Delta Ct_{(housekeeping\ gene)})_{control\ condition}$ . *Rpl13a* was used as a stable housekeeping gene  
15 and D0 or siControl were used as control condition. Sequences of the primer pairs are  
16 listed in Supplementary Table S5.

17

18

### Chromatin Immunoprecipitation

19 Chromatin immunoprecipitation of histone modifications was performed on indicated  
20 time points of adipocyte and osteoblast differentiation. Cells were grown on 10 cm<sup>2</sup>  
21 dishes. First, chromatin was cross-linked with formaldehyde (Sigma-Aldrich, F8775-  
22 25ML) at a final concentration of 1% in the culture media for 8 minutes at room  
23 temperature. Then, the cross-linked reaction was quenched with glycine (Carl Roth,  
24 3908.3) at a final concentration of 125 mM for 5 minutes at room temperature. The  
25

Gerard *et al.*: Time-series epigenomic profiles of mesenchymal differentiation

1 formaldehyde-glycine solution was removed and cells were washed twice with ice-  
2 cold phosphate-buffered saline (PBS) (Lonza, BE17-516F) containing cComplete™  
3 mini Protease Inhibitor (PI) Cocktail (Roche, 11846145001). Then, cells were lysed in  
4 1.7 mL of ice-cold lysis buffer [5 mM 1,4-Piperazinediethanesulfonic acid (PIPES)  
5 pH 8.0 (Carl Roth, 9156.3); 85 mM potassium chloride (KCl) (PanReac AppliChem,  
6 A2939); 0.5 % 4-Nonylphenyl-polyethylene glycol (NP-40) (Fluka Biochemika,  
7 74385)] containing PI and incubated for 30 minutes on ice. The cell lysates were then  
8 centrifuged at 660 xg for 10 min at 7°C and the pellet was resuspended in 400 µL of  
9 ice-cold shearing buffer [50 mM Tris Base pH 8.1 (Carl Roth, 4855.2); 10 mM  
10 Ethylenediamine tetraacetic acid (EDTA) (Carl Roth, CN06.3); 0.1 % Sodium  
11 Dodecylsulfate (SDS) (PanReac AppliChem, A7249); 0.5 % Sodium deoxycholate  
12 (Fluka Biochemika, 30970)] containing PI. Chromatin was sheared with a sonicator  
13 (Bioruptor®Standard Diagenode, UCD-200™-EX) during 20 cycles at high  
14 intensity (30 s off and 30 s on) for the ST2 cells differentiated into adipocytes and  
15 osteoblasts and 25 cycles at high intensity (30 s off and 30 s on) for the ST2  
16 differentiated into osteoblasts for 9 days on. The sheared cell lysate was then  
17 centrifuged at 20817 xg for 10 minutes at 7°C and the supernatant containing the  
18 sheared chromatin was transferred to a new tube. For each immunoprecipitation 10 µg  
19 (for H3K4me3) or 15 µg (for H3K27ac and H3K36me3) of sheared chromatin and 4  
20 µg as input were used. The sheared chromatin was diluted 1:10 with modified RIPA  
21 buffer [140 mM NaCl (Carl Roth, 3957.2); 10 mM Tris pH 7.5 (Carl Roth, 4855.2); 1  
22 mM EDTA (Carl Roth, CN06.3); 0.5 mM ethylene glycol-bis(β-amino-ethyl ether)-  
23 N,N,N',N'-tetraacetic acid (EGTA) (Carl Roth, 3054.3); 1 % Triton X-100 (Carl  
24 Roth, 3051.2); 0.01 % SDS (PanReac AppliChem, A7249); 0.1 % sodium  
25 deoxycholate (Fluka Biochemika, 30970)] containing PI. The diluted sheared

Gerard *et al.*: Time-series epigenomic profiles of mesenchymal differentiation

1 chromatin was incubated overnight with the recommended amount provided by the  
2 manufacturer of an antibody against H3K4me3 (Millipore, 17-614), 5 µg of an  
3 antibody against H3K27ac (Abcam, ab4729) or 5 µg of an antibody against  
4 H3K36me3 (Abcam, ab9050). The next day, the antibodies were captured using 25  
5 µL of PureProteome™ Protein A Magnetic (PAM) Bead System (Millipore,  
6 LSKMAGA10) for 2 hours at 4°C on a rotating wheel. After, the PAM beads were  
7 captured using a DynaMag™-2 magnetic stand (Life Technologies, 12321D). The  
8 supernatant was discarded and the PAM beads were washed twice with 800 µL of  
9 Immunoprecipitation wash buffer 1 (IPWB1) [20 mM Tris, pH 8.1 (Carl Roth,  
10 4855.2); 50 mM NaCl (Carl Roth, 3957.2); 2 mM EDTA (Carl Roth, CN06.3); 1 %  
11 Triton X-100 (Carl Roth, 3051.2); 0.1 % SDS (PanReac Applichem, A7249)], once  
12 with 800 µL of Immunoprecipitation wash buffer 2 (IPWB2) [10 mM Tris, pH 8.1  
13 (Carl Roth, 4855.2); 150 mM NaCl (Carl Roth, 3957.2); 1 mM EDTA (Carl Roth,  
14 CN06.3), 1 % NP-40 (Fluka Biochemika, 74385), 1 % sodium deoxycholate (Fluka  
15 Biochemika, 30970), 250 mM of lithium chloride (LiCl) (Carl Roth, 3739.1)], and  
16 twice with 800 µL of Tris-EDTA (TE) buffer [10 mM Tris, pH 8.1 (Carl Roth,  
17 4855.2); 1 mM EDTA (Carl Roth, CN06.3), pH 8.0]. Finally, the PAM beads and the  
18 inputs were incubated with 100 µL of CHIP elution buffer [0.1 M sodium bicarbonate  
19 (NaHCO<sub>3</sub>) (Sigma-Aldrich, S5761); 1 % SDS (PanReac Applichem, A7249)]. The  
20 cross-linking was reversed by adding 10 µg of RNase A (ThermoFisher, EN0531) and  
21 20 µg of proteinase K (ThermoFisher, EO0491) at 65°C overnight. Then, the eluted  
22 chromatin was purified using a MinElute Reaction Cleanup Kit (Qiagen, 28206)  
23 according to the manufacturer's instructions. The DNA concentration was measured  
24 using the Qubit® dsDNA HS Assay Kit (ThermoFisher, Q32851) and the Qubit 1.0  
25 fluorometer (Invitrogen, Q32857) according to the manufacturer's instructions.

Gerard *et al.*: Time-series epigenomic profiles of mesenchymal differentiation

1

2

## ChIP-Seq

3 The sequencing of the ChIP samples was done at the Genomics Core Facility in  
4 EMBL Heidelberg, Germany. For sequencing, single-end and unstranded reads were  
5 used and the samples were processed in an Illumina CBot and sequenced in an  
6 Illumina HiSeq 2000 machine. In total, 979 572 918 raw reads were obtained. Raw  
7 reads quality was assessed by fastqc [v0.11, ("FastQC,")]. This quality control  
8 unveiled that some reads were containing part of the adapters. Those spurious  
9 sequences were cleaned up from the genuine mouse sequences by AdapterRemoval  
10 (Lindgreen, 2012) [v1.5]. The PALEOMIX pipeline (Schubert et al., 2014) [v1.0.1]  
11 was used for all steps from FASTQ files to BAM files including trimming, mapping,  
12 and duplicate marking. This workflow ensures that all files are complete and valid.  
13 Retained reads were required to have a minimum length of 25 bp. Bases with  
14 unreliable Phred scores (0-2) were trimmed out. In total 31 909 435 reads were  
15 discarded (3.26%). Eventually, 947 663 483 reads were retained (96.74%). Trimmed  
16 reads were further mapped using BWA (Li & Durbin, 2009) [v0.7.10] with the  
17 backtrack algorithm dedicated to short sequences. The mouse reference was the  
18 mouse genome GRCm38.p3 (mm10, patch 3) downloaded from NCBI. For validating,  
19 merging BAM files, and marking duplicates, we used the suite tool Picard [v1.119,  
20 ("Picard,")]. Duplicates were marked but not removed. Only reads with a mapping  
21 quality of 30 were retained to ensure a unique location on the genome resulting in 661  
22 364 143 reads (69.79% of the trimmed reads). The samples with a coverage of less  
23 than 8 million reads (mapping quality > 30) were excluded from the downstream  
24 analysis. Raw FASTQ and BAM files have been deposited in the European  
25 Nucleotide Archive with the accession number PRJEB20933.



Gerard *et al.*: Time-series epigenomic profiles of mesenchymal differentiation

1 The ChIP-Seq peaks were called with Model-based analysis of ChIP-Seq (Zhang et  
2 al., 2008) (MACS) version 2.1.0 for H3K4me3, with HOMER (Heinz et al., 2010) for  
3 H3K27ac, and with SICER (Zang et al., 2009) version 1.1 for H3K36me3, using input  
4 from undifferentiated ST2 cells as control for IPs from D0 cells and input from D5  
5 adipocyte- or osteoblast-differentiated cells for the IPs from the respectively  
6 differentiated cells.

7

## 8 **RNA-Seq**

9 The sequencing of the time course samples was done at the Genomics Core Facility in  
10 EMBL Heidelberg, Germany. For sequencing, single-end and unstranded reads were  
11 used and the samples were processed in an Illumina CBot and sequenced in an  
12 Illumina NextSeq machine.

13 The sequencing of the AHR knock-down samples was performed at the Luxembourg  
14 Center for Systems Biomedicine (LCSB) Sequencing Facility. The TruSeq Stranded  
15 mRNA Library Prep kit (Illumina) was used to prepare the library for sequencing with  
16 1 µg of RNA as starting material according to manufacturer's protocol. The library  
17 quality was checked using an Agilent 2100 Bioanalyzer and quantified using Qubit  
18 dsDNA HS assay Kit. The libraries were then adjusted to 4 nM and sequenced on a  
19 NextSeq 500 (Illumina) according to the manufacturer's instructions.

20 The obtained reads were quality checked using FastQC version 0.11.3 ("FastQC").  
21 Cutadapt version 1.8.1 (Martin, 2011) was used to trim low quality reads (-q 30  
22 parameter), remove Illumina adapters (-a parameter), remove reads shorter than 20  
23 bases (-m 20 parameter) with an error tolerance of 10% (-e 0.1 parameter).  
24 Then, removal of reads mapping to rRNA species was performed using SortMeRNA  
25 (Kopylova et al., 2012) with the parameters --other, --log, -a, -v, --fastx

Gerard *et al.*: Time-series epigenomic profiles of mesenchymal differentiation

1 enabled. Lastly, the reads were quality checked using FastQC version 0.11.3 to  
2 control whether bias could have been introduced after the removal of Illumina  
3 adapters, low quality reads and rRNA reads. Then, the reads were mapped to the  
4 mouse genome mm10 (GRCm38.p3) and using the gene annotation downloaded from  
5 Ensembl (release 79) using the Spliced Transcripts Alignment to a Reference (Dobin  
6 *et al.*, 2013) (STAR) version 2.5.2b using the previously described parameters  
7 (Baruzzo *et al.*, 2017). The reads were counted using the function *featureCounts* from  
8 the R package *Rsubread* (Liao *et al.*, 2014) version 1.4.6-p3 and the statistical  
9 analysis was performed using DESeq2 (Love *et al.*, 2014) version 1.14.1 in R 3.3.2  
10 and RStudio (RStudio Team (2015). RStudio: Integrated Development for R.  
11 RStudio, Inc., Boston, MA).

12

### 13 **EPIC-DREM analysis**

14 To identify TFs that have a regulatory function over time, we designed a new  
15 computational workflow that combines the computational TF prediction method  
16 TEPIC (Schmidt *et al.*, 2017) with DREM (Schulz *et al.*, 2012), a tool to analyze the  
17 dynamics of transcriptional regulation.

18 We identified TF footprints in the H3K27ac signal using HINT-BC (Gusmao *et al.*,  
19 2016), which is included in the Regulatory Genomics Toolbox, version 0.9.9. Next,  
20 we predicted TF binding in those footprints using TEPIC, version 2.0. We used the  
21 provided set of 687 PWMs for *Mus musculus* and mouse genome version mm10  
22 (GRCm38). As DREM requires a time point-specific prediction of binding of a  
23 regulator with its target, we needed to develop an approach to determine a suitable  
24 TF-specific affinity cut-off, for each time point. For this, we created a similar set of  
25 random regions that mirrors the GC content and length distribution of the original

Gerard *et al.*: Time-series epigenomic profiles of mesenchymal differentiation

1 sequences of the footprints. TF affinities  $\alpha_r$  calculated in the random regions are used  
2 to determine a suitable cut-off for the original affinities  $\alpha_o$  using the frequency  
3 distribution of the TF affinities. Affinities for TF  $i$  are denoted by  $\alpha_{ri}$  and  $\alpha_{oi}$ . Let  
4  $r \in R$  denote a randomly chosen genomic region that is screened for TF binding, and  
5 let  $|r|$  denote its length. Analogously, let  $o \in O$  denote a footprint that is screened for  
6 TF binding, and let  $|o|$  denote its length. We normalize both  $\alpha_{ri}$  and  $\alpha_{oi}$  by the  
7 length of their corresponding region and obtain the normalized TF affinities  $\alpha'_{ri}$  and  
8  $\alpha'_{oi}$ :

$$9 \quad \alpha'_{ri} = \frac{\alpha_{ri}}{|r|}, \quad \alpha'_{oi} = \frac{\alpha_{oi}}{|o|}.$$

10 Using the distribution of  $\alpha'_{ri}$  values we derive a TF-specific affinity threshold  $t_i$  for a  
11 p-value cut-off of 0.05 (See section *ChIP-seq validation of TEPIC affinity cut-off* for  
12 how this p-value was chosen). For a TF  $i$ , we compute a binary affinity value  $b_{oi}$   
13 from the original affinity  $\alpha'_{oi}$  according to the cut-off  $t_i$  with:

$$14 \quad b_{oi} = \begin{cases} 1, & \alpha'_{oi} > t_i \\ 0, & \alpha'_{oi} \leq t_i. \end{cases}$$

15 The binary affinity values  $b_{oi}$  can be used to compute a binary TF – gene association  
16  $\alpha_{gi}$  between gene  $g$  and TF  $i$ :

$$17 \quad \alpha_{gi} = \begin{cases} 1, & \exists o \in O_{gw}: \alpha'_{oi} = 1 \\ 0, & \text{otherwise} \end{cases}, \text{ where } O_{gw} \text{ denotes all footprint regions that occur}$$

18 within a window of size  $w$  around the TSS of gene  $g$ .

19 Informally, a gene  $g$  is associated to TF  $i$  if there is a predicted binding site within a  
20 window of predefined size  $w$  around the gene's TSS. Here, we use  $w = 50kb$ .

21 Together with gene expression estimates, the TF– gene associations can be directly  
22 used as input to DREM. In this analysis, we used version 2.0.3 of DREM. The entire  
23 workflow of EPIC-DREM is shown in Figure 2. TEPIC is available online at  
24 ("TEPIC"), DREM can be downloaded at ("DREM").

1

2

### ChIP-seq validation of TEPIC affinity cut-off

3

To validate that the affinity threshold described above indeed results in an adequate

4

separation between bound and unbound sites, we conducted a comparison to TF-

5

ChIP-seq data. We obtained TF-ChIP-seq data from ENCODE for K562 (18 TFs),

6

HepG2 (36 TFs), and GM12878 (24 TFs). In addition, we downloaded H3K27ac data

7

for the mentioned cell lines from ENCODE. A list of all ENCODE accession numbers

8

is provided in Supplementary Table S6. As described above, we called footprints

9

using HINT-BC and calculated TF affinities in the footprints as well as in the

10

randomly selected regions that map the characteristics of the footprints. To understand

11

the influence of different thresholds, we calculated affinity thresholds for the

12

following p-values: 0.01, 0.025, 0.05, 0.075, 0.1, 0.2, 0.3, 0.4, and 0.5. All affinities

13

below the selected affinity value are set to zero, the remaining values are set to one.

14

The quality of the discretization is assessed through the following "peak centric"

15

validation scheme, as used before in (Cuellar-Partida *et al.*, 2012). The positive set of

16

the gold standard is comprised of all ChIP-seq peaks that contain a motif predicted by

17

FIMO (Grant *et al.*, 2011), the negative set contains all remaining ChIP-seq peaks. A

18

prediction is counting as a true positive (TP) if it overlaps the positive set, it counts as

19

a false positive (FP) if it overlaps the negative set. The number of false negatives (FN)

20

is the number of all entries in the positive set that are not overlapped by any

21

prediction. For all TFs in all cell lines we calculate Precision (PR) and Recall (REC)

22

according to

23

$$PR = \frac{TP}{TP+FP}, \quad REC = \frac{TP}{TP+FN}.$$

24

As one can see, Precision is increasing with a stricter p-value threshold, while Recall

25

is decreasing. We found that using 0.05 seems to be a reasonable compromise

Gerard *et al.*: Time-series epigenomic profiles of mesenchymal differentiation

1 between Precision and Recall. The median Precision and Recall values calculated  
2 over all cell lines and all TFs are shown in Supplementary Figure S2A. Detailed  
3 results on a selection of TFs that are present in all three cell lines are shown in  
4 Supplementary Figure S2B.

5

## 6 **Identification of dynamic merged SEs**

7 In order to identify temporal SEs across both lineages, BedTools (Quinlan & Hall,  
8 2010) version 2.24.0, Hypergeometric Optimization of Motif EnRichment (Heinz et  
9 al., 2010) (HOMER) version 4.7.2 and Short Time-series Expression Miner (Ernst &  
10 Bar-Joseph, 2006) (STEM) version 1.3.8 were used. First, the coverage of individual  
11 SEs was summarized using `genomeCoverageBed` command using `-g mm10` and  
12 `-bg` parameters. Then, `unionBedGraphs` command was used to combine multiple  
13 SEs coverage into a single map such that the SEs' coverage is directly comparable  
14 across multiple samples. Finally, `mergeBed` command was used to combine SEs  
15 overlapping  $\geq 1$  bp into a single merged SE which spans all the combined SEs. In  
16 order to calculate the normalized read count number of merged SEs,  
17 `annotatePeaks.pl` with `-size given` and `-noann` parameters was used.  
18 Lastly, STEM was used to cluster and identify SEs temporal profiles and SEs with  
19 *Maximum\_Unit\_Change\_in\_Model\_Profiles\_between\_Time\_Points 2* and *Minimum*  
20 *Absolute Expression Change 1.0* were considered as dynamic.

21

## 22 **Enrichment analysis**

23 EnrichR (14.4.2017) (Chen et al., 2013; Kuleshov et al., 2016) was used to perform  
24 gene enrichment analysis.

25

1 **Availability of data and materials**

2 The datasets generated and analysed during the current study are available in the  
3 European Nucleotide Archive with the accession number PRJEB20933. Scripts can be  
4 requested from authors directly.

5

6 **ACKNOWLEDGEMENTS**

7 We would like to thank Dr. Maria Bouvy-Liivrand for help with establishing the ST2  
8 cell culture and differentiation and EMBL Gene Core at Heidelberg for support with  
9 high-throughput sequencing. The experiments presented in this paper were carried out  
10 using the HPC facilities of the University of Luxembourg (Varrette et al., 2014).

11

12

13 **COMPETING INTERESTS**

14 The authors declare they have no competing interests.

15

16 **FUNDING**

17 This work was supported by funding from the University of Luxembourg. DG was  
18 supported by fellowship from the Luxembourg National Research Fund (FNR) (AFR  
19 7924045).

20

21 **AUTHOR CONTRIBUTIONS**

22 DG, TS and LS conceived the project and designed the experiments and analysis. DG  
23 performed all the experiments and DG and LS analyzed the results. DG and AG

Gerard *et al.*: Time-series epigenomic profiles of mesenchymal differentiation

1 performed the RNA-seq and ChIP-seq analysis. FS and MHS developed the EPIC-  
2 DREM approach. DG, FS and MHS performed the EPIC-DREM analysis. MS  
3 performed the Western blot analysis. RH prepared the libraries and performed the  
4 sequencing for the AHR-KD experiments. PE developed the randomization method to  
5 derive control footprint regions. All authors commented on the manuscript.

6

7

8

9

10

11

12

13

14

15

16

17

18

19

20

21

22

23

1 **REFERENCES**

- 2
- 3 Aguirre, A., Montserrat, N., Zacchigna, S., Nivet, E., Hishida, T., Krause, Marie N.,  
4 Kurian, L., Ocampo, A., Vazquez-Ferrer, E., Rodriguez-Esteban, C., Kumar,  
5 S., Moresco, James J., Yates Iii, John R., Campistol, Josep M., Sancho-  
6 Martinez, I., Giacca, M., & Izpisua Belmonte, J. C. (2014). In Vivo Activation  
7 of a Conserved MicroRNA Program Induces Mammalian Heart Regeneration.  
8 *Cell Stem Cell*, 15(5), 589-604. doi:<https://doi.org/10.1016/j.stem.2014.10.003>
- 9 Alexander, D. L., Ganem, L. G., Fernandez-Salguero, P., Gonzalez, F., & Jefcoate, C.  
10 R. (1998). Aryl-hydrocarbon receptor is an inhibitory regulator of lipid  
11 synthesis and of commitment to adipogenesis. *J Cell Sci*, 111 ( Pt 22), 3311-  
12 3322.
- 13 Ambrosi, T. H., Scialdone, A., Graja, A., Gohlke, S., Jank, A. M., Bocian, C., Woelk,  
14 L., Fan, H., Logan, D. W., Schurmann, A., Saraiva, L. R., & Schulz, T. J.  
15 (2017). Adipocyte Accumulation in the Bone Marrow during Obesity and  
16 Aging Impairs Stem Cell-Based Hematopoietic and Bone Regeneration. *Cell*  
17 *Stem Cell*, 20(6), 771-784.e776. doi:10.1016/j.stem.2017.02.009
- 18 Baruzzo, G., Hayer, K. E., Kim, E. J., Di Camillo, B., FitzGerald, G. A., & Grant, G.  
19 R. (2017). Simulation-based comprehensive benchmarking of RNA-seq  
20 aligners. *Nat Methods*, 14(2), 135-139. doi:10.1038/nmeth.4106
- 21 Boitano, A. E., Wang, J., Romeo, R., Bouchez, L. C., Parker, A. E., Sutton, S. E.,  
22 Walker, J. R., Flaveny, C. A., Perdew, G. H., Denison, M. S., Schultz, P. G.,  
23 & Cooke, M. P. (2010). Aryl hydrocarbon receptor antagonists promote the  
24 expansion of human hematopoietic stem cells. *Science*, 329(5997), 1345-1348.  
25 doi:10.1126/science.1191536



- 1 Bray, S. J. (2016). Notch signalling in context. *Nat Rev Mol Cell Biol*, 17(11), 722-  
2 735. doi:10.1038/nrm.2016.94
- 3 Cawthorn, W. P., Scheller, E. L., Learman, B. S., Parlee, S. D., Simon, B. R., Mori,  
4 H., Ning, X., Bree, A. J., Schell, B., Broome, D. T., Soliman, S. S.,  
5 DelProposto, J. L., Lumeng, C. N., Mitra, A., Pandit, S. V., Gallagher, K. A.,  
6 Miller, J. D., Krishnan, V., Hui, S. K., Bredella, M. A., et al. (2014). Bone  
7 marrow adipose tissue is an endocrine organ that contributes to increased  
8 circulating adiponectin during caloric restriction. *Cell Metab*, 20(2), 368-375.  
9 doi:10.1016/j.cmet.2014.06.003
- 10 Chen, E. Y., Tan, C. M., Kou, Y., Duan, Q., Wang, Z., Meirelles, G. V., Clark, N. R.,  
11 & Ma'ayan, A. (2013). Enrichr: interactive and collaborative HTML5 gene list  
12 enrichment analysis tool. *BMC Bioinformatics*, 14, 128. doi:10.1186/1471-  
13 2105-14-128
- 14 Consortium, F., the, R. P., Clst, Forrest, A. R., Kawaji, H., Rehli, M., Baillie, J. K., de  
15 Hoon, M. J., Haberle, V., Lassmann, T., Kulakovskiy, I. V., Lizio, M., Itoh,  
16 M., Andersson, R., Mungall, C. J., Meehan, T. F., Schmeier, S., Bertin, N.,  
17 Jorgensen, M., Dimont, E., et al. (2014). A promoter-level mammalian  
18 expression atlas. *Nature*, 507(7493), 462-470. doi:10.1038/nature13182
- 19 Cuellar-Partida, G., Buske, F. A., McLeay, R. C., Whittington, T., Noble, W. S., &  
20 Bailey, T. L. (2012). Epigenetic priors for identifying active transcription  
21 factor binding sites. *Bioinformatics*, 28(1), 56-62.  
22 doi:10.1093/bioinformatics/btr614
- 23 Cui, W., Cuartas, E., Ke, J., Zhang, Q., Einarsson, H. B., Sedgwick, J. D., Li, J., &  
24 Vignery, A. (2007). CD200 and its receptor, CD200R, modulate bone mass  
25 via the differentiation of osteoclasts. *Proceedings of the National Academy of*

Gerard *et al.*: Time-series epigenomic profiles of mesenchymal differentiation

- 1           *Sciences of the United States of America*, 104(36), 14436-14441.  
2           doi:10.1073/pnas.0702811104
- 3   Dobin, A., Davis, C. A., Schlesinger, F., Drenkow, J., Zaleski, C., Jha, S., Batut, P.,  
4           Chaisson, M., & Gingeras, T. R. (2013). STAR: ultrafast universal RNA-seq  
5           aligner. *Bioinformatics*, 29(1), 15-21. doi:10.1093/bioinformatics/bts635
- 6   DREM [<http://sb.cs.cmu.edu/drem/>] 10 September 2016
- 7   Dukler, N., Gulko, B., Huang, Y. F., & Siepel, A. (2016). Is a super-enhancer greater  
8           than the sum of its parts? *Nat Genet*, 49(1), 2-3. doi:10.1038/ng.3759
- 9   Ernst, J., & Bar-Joseph, Z. (2006). STEM: a tool for the analysis of short time series  
10           gene expression data. *BMC Bioinformatics*, 7, 191. doi:10.1186/1471-2105-7-  
11           191
- 12   Farmer, S. R. (2006). Transcriptional control of adipocyte formation. *Cell Metab*,  
13           4(4), 263-273. doi:10.1016/j.cmet.2006.07.001
- 14   FastQC [<http://www.bioinformatics.babraham.ac.uk/projects/fastqc>] 05 December  
15           2014
- 16   Fazeli, P. K., Horowitz, M. C., MacDougald, O. A., Scheller, E. L., Rodeheffer, M.  
17           S., Rosen, C. J., & Klibanski, A. (2013). Marrow fat and bone--new  
18           perspectives. *J Clin Endocrinol Metab*, 98(3), 935-945. doi:10.1210/jc.2012-  
19           3634
- 20   Galhardo, M., Berninger, P., Nguyen, T. P., Sauter, T., & Sinkkonen, L. (2015). Cell  
21           type-selective disease-association of genes under high regulatory load. *Nucleic*  
22           *Acids Res*, 43(18), 8839-8855. doi:10.1093/nar/gkv863
- 23   Galhardo, M., Sinkkonen, L., Berninger, P., Lin, J., Sauter, T., & Heinaniemi, M.  
24           (2014). Integrated analysis of transcript-level regulation of metabolism reveals

Gerard *et al.*: Time-series epigenomic profiles of mesenchymal differentiation

- 1 disease-relevant nodes of the human metabolic network. *Nucleic Acids Res*,  
2 42(3), 1474-1496. doi:10.1093/nar/gkt989
- 3 Gasiewicz, T. A., Singh, K. P., & Bennett, J. A. (2014). The Ah receptor in stem cell  
4 cycling, regulation, and quiescence. *Ann N Y Acad Sci*, 1310, 44-50.  
5 doi:10.1111/nyas.12361
- 6 Gerard, D., Schmidt, F., Ginolhac, A., Schmitz, M., Halder, R., Ebert, P., Schulz, M.,  
7 Sauter, T., & Sinkkonen, L. (2017). Data from: Temporal epigenomic profiling  
8 identifies AHR as a dynamic super-enhancer controlled regulator of  
9 mesenchymal multipotency Dryad Digital Repository database.  
10 doi:10.5061/dryad.r32t3
- 11 Goode, D. K., Obier, N., Vijayabaskar, M. S., Lie, A. L. M., Lilly, A. J., Hannah, R.,  
12 Lichtinger, M., Batta, K., Florkowska, M., Patel, R., Challinor, M., Wallace,  
13 K., Gilmour, J., Assi, S. A., Cauchy, P., Hoogenkamp, M., Westhead, D. R.,  
14 Lacaud, G., Kouskoff, V., Gottgens, B., et al. (2016). Dynamic Gene  
15 Regulatory Networks Drive Hematopoietic Specification and Differentiation.  
16 *Dev Cell*, 36(5), 572-587. doi:10.1016/j.devcel.2016.01.024
- 17 Grant, C. E., Bailey, T. L., & Noble, W. S. (2011). FIMO: scanning for occurrences  
18 of a given motif. *Bioinformatics*, 27(7), 1017-1018.  
19 doi:10.1093/bioinformatics/btr064
- 20 Gu, D., Yu, B., Zhao, C., Ye, W., Lv, Q., Hua, Z., Ma, J., & Zhang, Y. (2007). The  
21 effect of pleiotrophin signaling on adipogenesis. *FEBS Letters*, 581(3), 382-  
22 388. doi:<https://doi.org/10.1016/j.febslet.2006.12.043>
- 23 Gusmao, E. G., Allhoff, M., Zenke, M., & Costa, I. G. (2016). Analysis of  
24 computational footprinting methods for DNase sequencing experiments. *Nat*  
25 *Meth*, 13(4), 303-309. doi:10.1038/nmeth.3772

Gerard *et al.*: Time-series epigenomic profiles of mesenchymal differentiation

- 1 Hassan, M. Q., Javed, A., Morasso, M. I., Karlin, J., Montecino, M., van Wijnen, A.  
2 J., Stein, G. S., Stein, J. L., & Lian, J. B. (2004). Dlx3 transcriptional  
3 regulation of osteoblast differentiation: temporal recruitment of Msx2, Dlx3,  
4 and Dlx5 homeodomain proteins to chromatin of the osteocalcin gene. *Mol*  
5 *Cell Biol*, 24(20), 9248-9261. doi:10.1128/mcb.24.20.9248-9261.2004
- 6 Heinz, S., Benner, C., Spann, N., Bertolino, E., Lin, Y. C., Laslo, P., Cheng, J. X.,  
7 Murre, C., Singh, H., & Glass, C. K. (2010). Simple combinations of lineage-  
8 determining transcription factors prime cis-regulatory elements required for  
9 macrophage and B cell identities. *Mol Cell*, 38(4), 576-589.  
10 doi:10.1016/j.molcel.2010.05.004
- 11 Hnisz, D., Abraham, B. J., Lee, T. I., Lau, A., Saint-Andre, V., Sigova, A. A., Hoke,  
12 H. A., & Young, R. A. (2013). Super-enhancers in the control of cell identity  
13 and disease. *Cell*, 155(4), 934-947. doi:10.1016/j.cell.2013.09.053
- 14 Hnisz, D., Schuijers, J., Lin, C. Y., Weintraub, A. S., Abraham, B. J., Lee, T. I.,  
15 Bradner, J. E., & Young, R. A. (2015). Convergence of developmental and  
16 oncogenic signaling pathways at transcriptional super-enhancers. *Mol Cell*,  
17 58(2), 362-370. doi:10.1016/j.molcel.2015.02.014
- 18 Huang, B., Butler, R., Miao, Y., Dai, Y., Wu, W., Su, W., Fujii-Kuriyama, Y.,  
19 Warner, M., & Gustafsson, J. A. (2016). Dysregulation of Notch and ERalpha  
20 signaling in AhR<sup>-/-</sup> male mice. *Proc Natl Acad Sci U S A*, 113(42), 11883-  
21 11888. doi:10.1073/pnas.1613269113
- 22 Janky, R., Verfaillie, A., Imrichova, H., Van de Sande, B., Standaert, L., Christiaens,  
23 V., Hulselmans, G., Herten, K., Naval Sanchez, M., Potier, D., Svetlichnyy,  
24 D., Kalender Atak, Z., Fiers, M., Marine, J. C., & Aerts, S. (2014). iRegulon:  
25 from a gene list to a gene regulatory network using large motif and track

Gerard *et al.*: Time-series epigenomic profiles of mesenchymal differentiation

- 1 collections. *PLoS Comput Biol*, 10(7), e1003731.  
2 doi:10.1371/journal.pcbi.1003731
- 3 Jensen, B. A., Leeman, R. J., Schlezinger, J. J., & Sherr, D. H. (2003). Aryl  
4 hydrocarbon receptor (AhR) agonists suppress interleukin-6 expression by  
5 bone marrow stromal cells: an immunotoxicology study. *Environ Health*, 2(1),  
6 16. doi:10.1186/1476-069x-2-16
- 7 Kopylova, E., Noe, L., & Touzet, H. (2012). SortMeRNA: fast and accurate filtering  
8 of ribosomal RNAs in metatranscriptomic data. *Bioinformatics*, 28(24), 3211-  
9 3217. doi:10.1093/bioinformatics/bts611
- 10 Korkalainen, M., Kallio, E., Olkku, A., Nelo, K., Ilvesaro, J., Tuukkanen, J.,  
11 Mahonen, A., & Viluksela, M. (2009). Dioxins interfere with differentiation of  
12 osteoblasts and osteoclasts. *Bone*, 44(6), 1134-1142.  
13 doi:10.1016/j.bone.2009.02.019
- 14 Kuleshov, M. V., Jones, M. R., Rouillard, A. D., Fernandez, N. F., Duan, Q., Wang,  
15 Z., Koplev, S., Jenkins, S. L., Jagodnik, K. M., Lachmann, A., McDermott, M.  
16 G., Monteiro, C. D., Gundersen, G. W., & Ma'ayan, A. (2016). Enrichr: a  
17 comprehensive gene set enrichment analysis web server 2016 update. *Nucleic  
18 Acids Res*, 44(W1), W90-97. doi:10.1093/nar/gkw377
- 19 Lee, J. S., Cella, M., McDonald, K. G., Garlanda, C., Kennedy, G. D., Nukaya, M.,  
20 Mantovani, A., Kopan, R., Bradfield, C. A., Newberry, R. D., & Colonna, M.  
21 (2011). AHR drives the development of gut ILC22 cells and postnatal  
22 lymphoid tissues via pathways dependent on and independent of Notch. *Nat  
23 Immunol*, 13(2), 144-151. doi:10.1038/ni.2187
- 24 Lee, N. K., Sowa, H., Hinoi, E., Ferron, M., Ahn, J. D., Confavreux, C., Dacquin, R.,  
25 Mee, P. J., McKee, M. D., Jung, D. Y., Zhang, Z., Kim, J. K., Mauvais-Jarvis,

- 1 F., Ducy, P., & Karsenty, G. (2007). Endocrine regulation of energy  
2 metabolism by the skeleton. *Cell*, *130*(3), 456-469.  
3 doi:10.1016/j.cell.2007.05.047
- 4 Li, H., & Durbin, R. (2009). Fast and accurate short read alignment with Burrows-  
5 Wheeler transform. *Bioinformatics*, *25*(14), 1754-1760.  
6 doi:10.1093/bioinformatics/btp324
- 7 Liao, Y., Smyth, G. K., & Shi, W. (2014). featureCounts: an efficient general purpose  
8 program for assigning sequence reads to genomic features. *Bioinformatics*,  
9 *30*(7), 923-930. doi:10.1093/bioinformatics/btt656
- 10 Lindgreen, S. (2012). AdapterRemoval: easy cleaning of next-generation sequencing  
11 reads. *BMC Res Notes*, *5*, 337. doi:10.1186/1756-0500-5-337
- 12 Long, F. (2011). Building strong bones: molecular regulation of the osteoblast  
13 lineage. *Nat Rev Mol Cell Biol*, *13*(1), 27-38. doi:10.1038/nrm3254
- 14 Love, M. I., Huber, W., & Anders, S. (2014). Moderated estimation of fold change  
15 and dispersion for RNA-seq data with DESeq2. *Genome Biol*, *15*(12), 550.  
16 doi:10.1186/s13059-014-0550-8
- 17 Maekawa, M., Yamaguchi, K., Nakamura, T., Shibukawa, R., Kodanaka, I., Ichisaka,  
18 T., Kawamura, Y., Mochizuki, H., Goshima, N., & Yamanaka, S. (2011).  
19 Direct reprogramming of somatic cells is promoted by maternal transcription  
20 factor Glis1. *Nature*, *474*(7350), 225-229. doi:10.1038/nature10106
- 21 Martin, M. (2011). Cutadapt removes adapter sequences from high-throughput  
22 sequencing reads. *2011*, *17*(1). doi:10.14806/ej.17.1.200
- 23 Meester-Smoor, M. A., Vermeij, M., van Helmond, M. J., Molijn, A. C., van Wely,  
24 K. H., Hekman, A. C., Vermey-Keers, C., Riegman, P. H., & Zwarthoff, E. C.  
25 (2005). Targeted disruption of the Mn1 oncogene results in severe defects in

Gerard *et al.*: Time-series epigenomic profiles of mesenchymal differentiation

- 1 development of membranous bones of the cranial skeleton. *Mol Cell Biol*,  
2 25(10), 4229-4236. doi:10.1128/mcb.25.10.4229-4236.2005
- 3 Mikkelsen, T. S., Xu, Z., Zhang, X., Wang, L., Gimble, J. M., Lander, E. S., & Rosen,  
4 E. D. (2010). Comparative epigenomic analysis of murine and human  
5 adipogenesis. *Cell*, 143(1), 156-169. doi:10.1016/j.cell.2010.09.006
- 6 Naruse, M., Ishihara, Y., Miyagawa-Tomita, S., Koyama, A., & Hagiwara, H. (2002).  
7 3-Methylcholanthrene, which binds to the arylhydrocarbon receptor, inhibits  
8 proliferation and differentiation of osteoblasts in vitro and ossification in vivo.  
9 *Endocrinology*, 143(9), 3575-3581. doi:10.1210/en.2002-220003
- 10 Neph, S., Vierstra, J., Stergachis, A. B., Reynolds, A. P., Haugen, E., Vernot, B.,  
11 Thurman, R. E., John, S., Sandstrom, R., Johnson, A. K., Maurano, M. T.,  
12 Humbert, R., Rynes, E., Wang, H., Vong, S., Lee, K., Bates, D., Diegel, M.,  
13 Roach, V., Dunn, D., et al. (2012). An expansive human regulatory lexicon  
14 encoded in transcription factor footprints. *Nature*, 489(7414), 83-90.  
15 doi:10.1038/nature11212
- 16 Nielsen, R., Pedersen, T. A., Hagenbeek, D., Moulos, P., Siersbaek, R., Megens, E.,  
17 Denissov, S., Borgesen, M., Francoijs, K. J., Mandrup, S., & Stunnenberg, H.  
18 G. (2008). Genome-wide profiling of PPARgamma:RXR and RNA  
19 polymerase II occupancy reveals temporal activation of distinct metabolic  
20 pathways and changes in RXR dimer composition during adipogenesis. *Genes*  
21 *Dev*, 22(21), 2953-2967. doi:10.1101/gad.501108
- 22 Ogawa, M., Nishikawa, S., Ikuta, K., Yamamura, F., Naito, M., Takahashi, K., &  
23 Nishikawa, S. (1988). B cell ontogeny in murine embryo studied by a culture  
24 system with the monolayer of a stromal cell clone, ST2: B cell progenitor

Gerard *et al.*: Time-series epigenomic profiles of mesenchymal differentiation

- 1           develops first in the embryonal body rather than in the yolk sac. *Embo j*, 7(5),  
2           1337-1343.
- 3   Parker, S. C., Stitzel, M. L., Taylor, D. L., Orozco, J. M., Erdos, M. R., Akiyama, J.  
4           A., van Bueren, K. L., Chines, P. S., Narisu, N., Black, B. L., Visel, A.,  
5           Pennacchio, L. A., & Collins, F. S. (2013). Chromatin stretch enhancer states  
6           drive cell-specific gene regulation and harbor human disease risk variants.  
7           *Proc Natl Acad Sci U S A*, 110(44), 17921-17926.  
8           doi:10.1073/pnas.1317023110
- 9   Picard [<http://broadinstitute.github.io/picard>] 04 July 2017.
- 10   Pradhan, R. N., Bues, J. J., Gardeux, V., Schwalie, P. C., Alpern, D., Chen, W.,  
11           Russeil, J., Raghav, S. K., & Deplancke, B. (2017). Dissecting the brown  
12           adipogenic regulatory network using integrative genomics. *Scientific Reports*,  
13           7, 42130. doi:10.1038/srep42130
- 14   Quinlan, A. R., & Hall, I. M. (2010). BEDTools: a flexible suite of utilities for  
15           comparing genomic features. *Bioinformatics*, 26(6), 841-842.  
16           doi:10.1093/bioinformatics/btq033
- 17   Rackham, O. J. L., Firas, J., Fang, H., Oates, M. E., Holmes, M. L., Knaupp, A. S.,  
18           The, F. C., Suzuki, H., Nefzger, C. M., Daub, C. O., Shin, J. W., Petretto, E.,  
19           Forrest, A. R. R., Hayashizaki, Y., Polo, J. M., & Gough, J. (2016). A  
20           predictive computational framework for direct reprogramming between human  
21           cell types. *Nat Genet*, 48(3), 331-335. doi:10.1038/ng.3487
- 22   Ramirez, R. N., El-Ali, N. C., Mager, M. A., Wyman, D., Conesa, A., & Mortazavi,  
23           A. (2017). Dynamic Gene Regulatory Networks of Human Myeloid  
24           Differentiation. *Cell Syst*, 4(4), 416-429.e413. doi:10.1016/j.cels.2017.03.005



Gerard *et al.*: Time-series epigenomic profiles of mesenchymal differentiation

- 1 Roider, H. G., Kanhere, A., Manke, T., & Vingron, M. (2007). Predicting  
2 transcription factor affinities to DNA from a biophysical model.  
3 *Bioinformatics*, 23(2), 134-141. doi:10.1093/bioinformatics/btl565
- 4 Scheller, E. L., Burr, A. A., MacDougald, O. A., & Cawthorn, W. P. (2016). Inside  
5 out: Bone marrow adipose tissue as a source of circulating adiponectin.  
6 *Adipocyte*, 5(3), 251-269. doi:10.1080/21623945.2016.1149269
- 7 Schmidt, F., Gasparoni, N., Gasparoni, G., Gianmoena, K., Cadenas, C., Polansky, J.  
8 K., Ebert, P., Nordström, K., Barann, M., Sinha, A., Fröhler, S., Xiong, J.,  
9 Dehghani Amirabad, A., Behjati Ardakani, F., Hutter, B., Zipprich, G., Felder,  
10 B., Eils, J., Brors, B., Chen, W., et al. (2017). Combining transcription factor  
11 binding affinities with open-chromatin data for accurate gene expression  
12 prediction. *Nucleic Acids Research*, 45(1), 54-66. doi:10.1093/nar/gkw1061
- 13 Schubert, M., Ermini, L., Der Sarkissian, C., Jonsson, H., Ginolhac, A., Schaefer, R.,  
14 Martin, M. D., Fernandez, R., Kircher, M., McCue, M., Willerslev, E., &  
15 Orlando, L. (2014). Characterization of ancient and modern genomes by SNP  
16 detection and phylogenomic and metagenomic analysis using PALEOMIX.  
17 *Nat Protoc*, 9(5), 1056-1082. doi:10.1038/nprot.2014.063
- 18 Schulz, M. H., Devanny, W. E., Gitter, A., Zhong, S., Ernst, J., & Bar-Joseph, Z.  
19 (2012). DREM 2.0: Improved reconstruction of dynamic regulatory networks  
20 from time-series expression data. *BMC Systems Biology*, 6, 104-104.  
21 doi:10.1186/1752-0509-6-104
- 22 Shimba, S., Wada, T., & Tezuka, M. (2001). Arylhydrocarbon receptor (AhR) is  
23 involved in negative regulation of adipose differentiation in 3T3-L1 cells:  
24 AhR inhibits adipose differentiation independently of dioxin. *J Cell Sci*,  
25 114(Pt 15), 2809-2817.

Gerard *et al.*: Time-series epigenomic profiles of mesenchymal differentiation

- 1 Shirakawa, K., Maeda, S., Gotoh, T., Hayashi, M., Shinomiya, K., Ehata, S.,  
2 Nishimura, R., Mori, M., Onozaki, K., Hayashi, H., Uematsu, S., Akira, S.,  
3 Ogata, E., Miyazono, K., & Imamura, T. (2006). CCAAT/enhancer-binding  
4 protein homologous protein (CHOP) regulates osteoblast differentiation. *Mol*  
5 *Cell Biol*, 26(16), 6105-6116. doi:10.1128/mcb.02429-05
- 6 Siersbaek, R., Madsen, J. G. S., Javierre, B. M., Nielsen, R., Bagge, E. K., Cairns, J.,  
7 Wingett, S. W., Traynor, S., Spivakov, M., Fraser, P., & Mandrup, S. (2017).  
8 Dynamic Rewiring of Promoter-Anchored Chromatin Loops during Adipocyte  
9 Differentiation. *Mol Cell*, 66(3), 420-435.e425.  
10 doi:10.1016/j.molcel.2017.04.010
- 11 Siersbaek, R., Rabiee, A., Nielsen, R., Sidoli, S., Traynor, S., Loft, A., La Cour  
12 Poulsen, L., Rogowska-Wrzesinska, A., Jensen, O. N., & Mandrup, S. (2014).  
13 Transcription factor cooperativity in early adipogenic hotspots and super-  
14 enhancers. *Cell Rep*, 7(5), 1443-1455. doi:10.1016/j.celrep.2014.04.042
- 15 Silva, B. C., & Kousteni, S. (2012). Role of Osteoblasts in Regulation of Energy  
16 Metabolism. *Clinical Reviews in Bone and Mineral Metabolism*, 11(1), 2-10.  
17 doi:10.1007/s12018-012-9128-8
- 18 Sutton, A. L., Zhang, X., Ellison, T. I., & Macdonald, P. N. (2005). The  
19 1,25(OH)<sub>2</sub>D<sub>3</sub>-regulated transcription factor MN1 stimulates vitamin D  
20 receptor-mediated transcription and inhibits osteoblastic cell proliferation. *Mol*  
21 *Endocrinol*, 19(9), 2234-2244. doi:10.1210/me.2005-0081
- 22 TEPIC [<https://github.com/SchulzLab/TEPIC>] 21 June 2017
- 23 The 3D Genome Browser [<http://3dgenome.org>] 06 May 2017
- 24 Tokuzawa, Y., Yagi, K., Yamashita, Y., Nakachi, Y., Nikaido, I., Bono, H.,  
25 Ninomiya, Y., Kanasaki-Yatsuka, Y., Akita, M., Motegi, H., Wakana, S.,

Gerard *et al.*: Time-series epigenomic profiles of mesenchymal differentiation

- 1 Noda, T., Sablitzky, F., Arai, S., Kurokawa, R., Fukuda, T., Katagiri, T.,  
2 Schonbach, C., Suda, T., Mizuno, Y., et al. (2010). Id4, a new candidate gene  
3 for senile osteoporosis, acts as a molecular switch promoting osteoblast  
4 differentiation. *PLoS Genet*, 6(7), e1001019.  
5 doi:10.1371/journal.pgen.1001019
- 6 Tong, Y., Niu, M., Du, Y., Mei, W., Cao, W., Dou, Y., Yu, H., Du, X., Yuan, H., &  
7 Zhao, W. (2017). Aryl hydrocarbon receptor suppresses the osteogenesis of  
8 mesenchymal stem cells in collagen-induced arthritic mice through the  
9 inhibition of beta-catenin. *Exp Cell Res*, 350(2), 349-357.  
10 doi:10.1016/j.yexcr.2016.12.009
- 11 Varrette, S., Bouvry, P., Cartiaux, H., & Georgatos, F. (2014, 21-25 July 2014).  
12 *Management of an academic HPC cluster: The UL experience*. Paper  
13 presented at the 2014 International Conference on High Performance  
14 Computing & Simulation (HPCS).
- 15 Wu, C., Jin, X., Tsueng, G., Afrasiabi, C., & Su, A. I. (2016). BioGPS: building your  
16 own mash-up of gene annotations and expression profiles. *Nucleic Acids Res*,  
17 44(D1), D313-316. doi:10.1093/nar/gkv1104
- 18 Wu, H., Gordon, J. A., Whitfield, T. W., Tai, P. W., van Wijnen, A. J., Stein, J. L.,  
19 Stein, G. S., & Lian, J. B. (2017). Chromatin dynamics regulate mesenchymal  
20 stem cell lineage specification and differentiation to osteogenesis. *Biochim*  
21 *Biophys Acta*, 1860(4), 438-449. doi:10.1016/j.bbagr.2017.01.003
- 22 Yoshida, C. A., Komori, H., Maruyama, Z., Miyazaki, T., Kawasaki, K., Furuichi, T.,  
23 Fukuyama, R., Mori, M., Yamana, K., Nakamura, K., Liu, W., Toyosawa, S.,  
24 Moriishi, T., Kawaguchi, H., Takada, K., & Komori, T. (2012). SP7 inhibits

Gerard *et al.*: Time-series epigenomic profiles of mesenchymal differentiation

- 1 osteoblast differentiation at a late stage in mice. *PLoS One*, 7(3), e32364.
- 2 doi:10.1371/journal.pone.0032364
- 3 Zang, C., Schones, D. E., Zeng, C., Cui, K., Zhao, K., & Peng, W. (2009). A
- 4 clustering approach for identification of enriched domains from histone
- 5 modification ChIP-Seq data. *Bioinformatics*, 25(15), 1952-1958.
- 6 doi:10.1093/bioinformatics/btp340
- 7 Zhang, X., Dowd, D. R., Moore, M. C., Kranenburg, T. A., Meester-Smoor, M. A.,
- 8 Zwarthoff, E. C., & MacDonald, P. N. (2009). Meningioma 1 is required for
- 9 appropriate osteoblast proliferation, motility, differentiation, and function. *J*
- 10 *Biol Chem*, 284(27), 18174-18183. doi:10.1074/jbc.M109.001354
- 11 Zhang, Y., Liu, T., Meyer, C. A., Eeckhoute, J., Johnson, D. S., Bernstein, B. E.,
- 12 Nusbaum, C., Myers, R. M., Brown, M., Li, W., & Liu, X. S. (2008). Model-
- 13 based analysis of ChIP-Seq (MACS). *Genome Biol*, 9(9), R137.
- 14 doi:10.1186/gb-2008-9-9-r137
- 15
- 16
- 17
- 18
- 19
- 20
- 21
- 22
- 23

**Figure 1****A**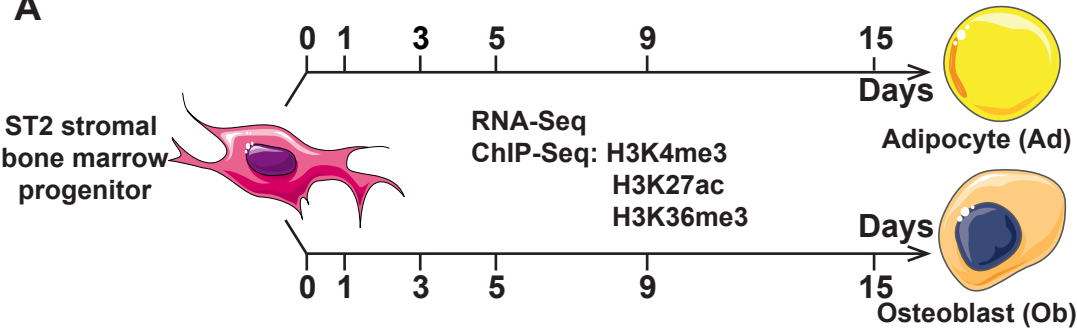**B**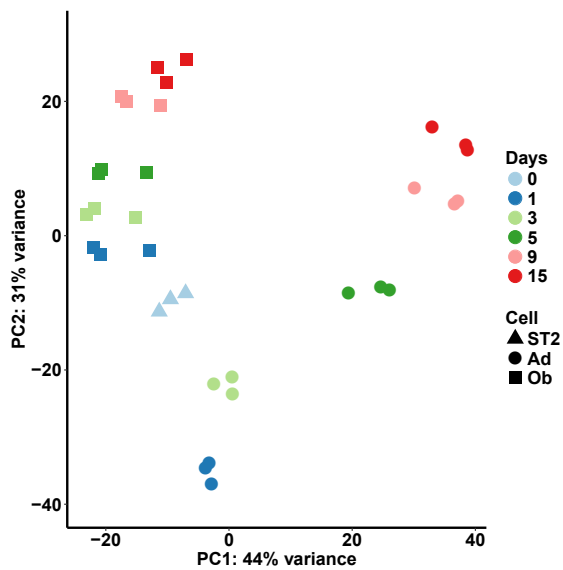**C**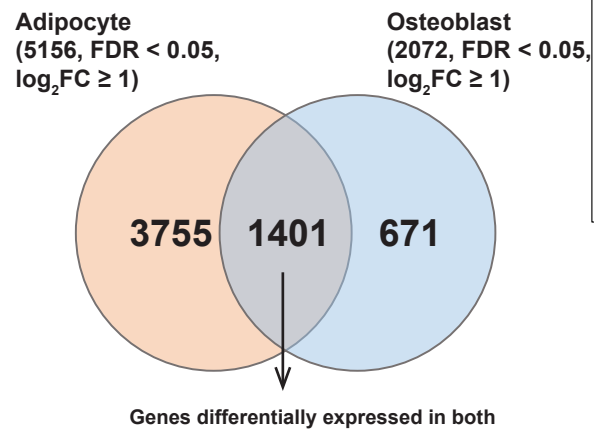**D**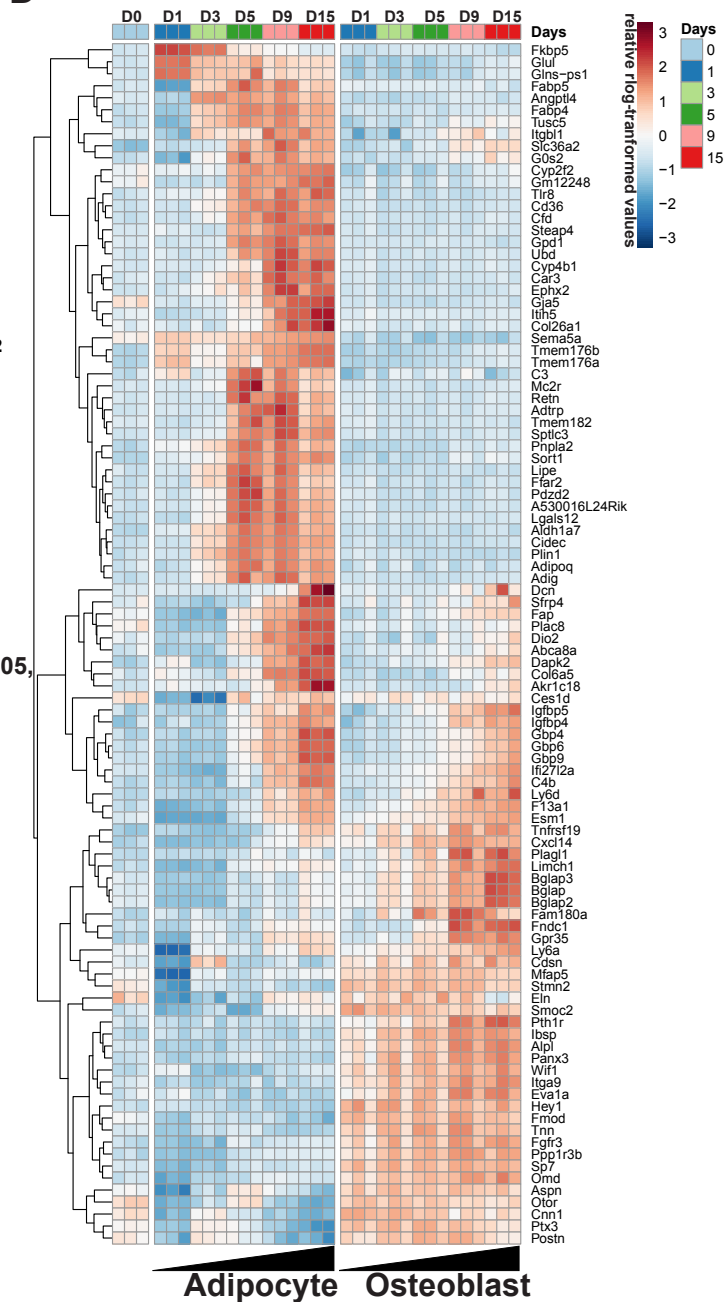

**Figure 2**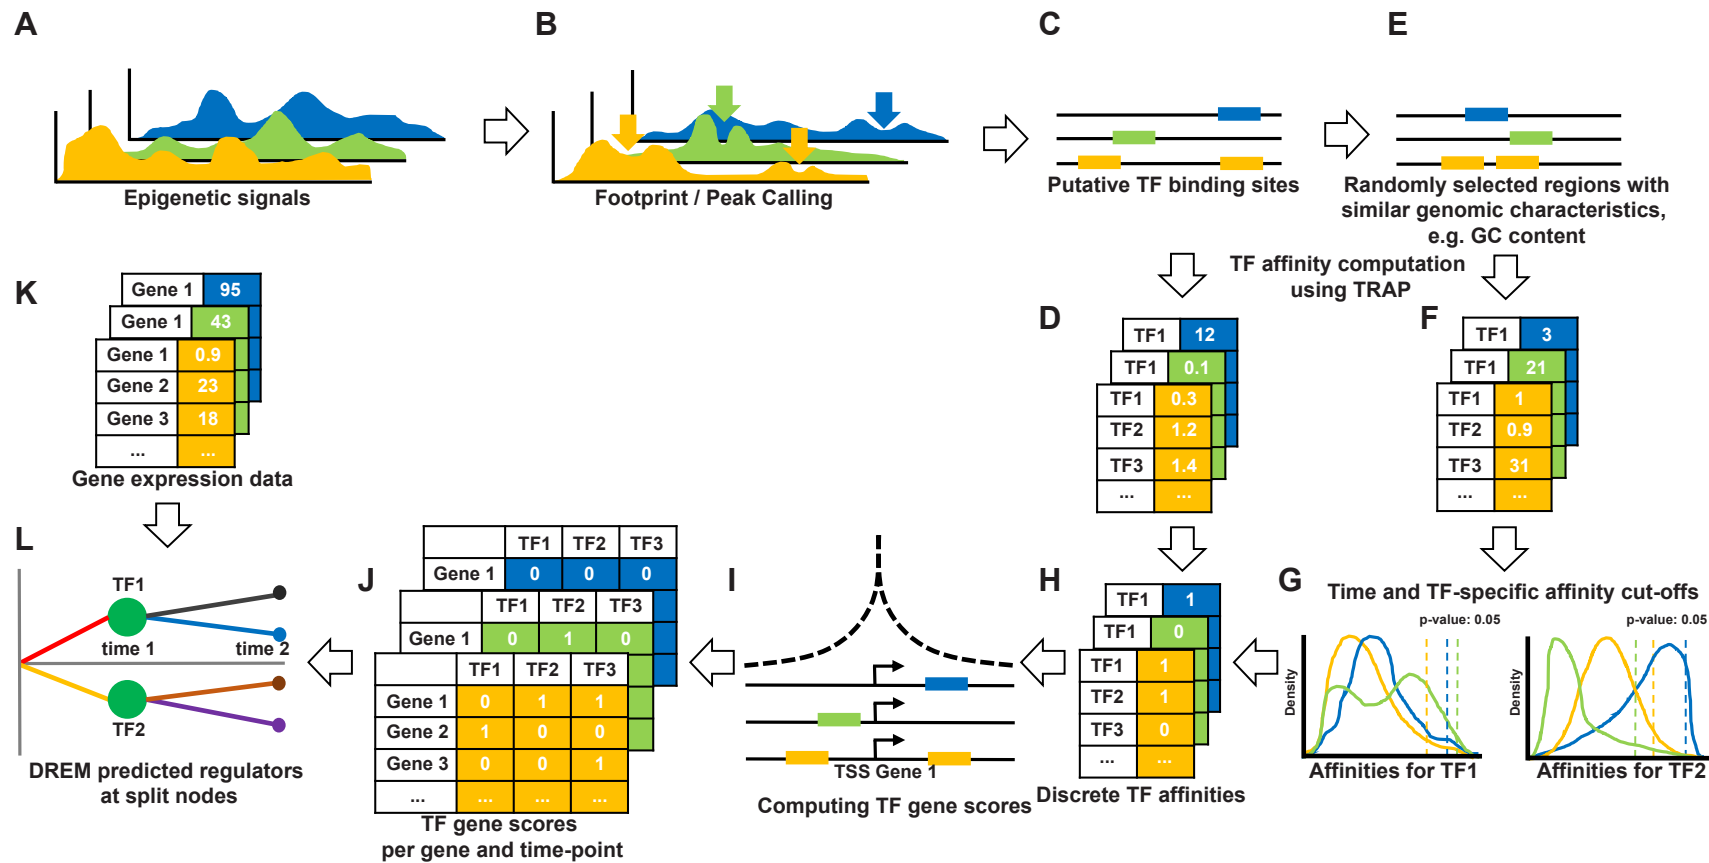

**Figure 3**

**A**

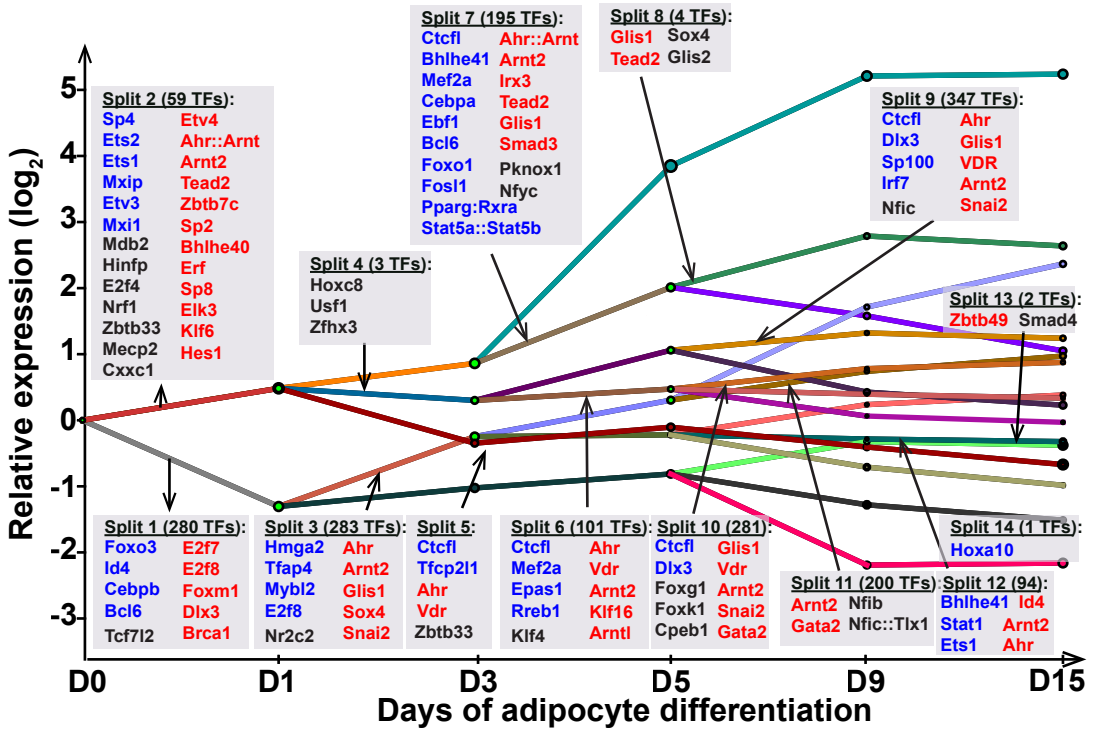

**B**

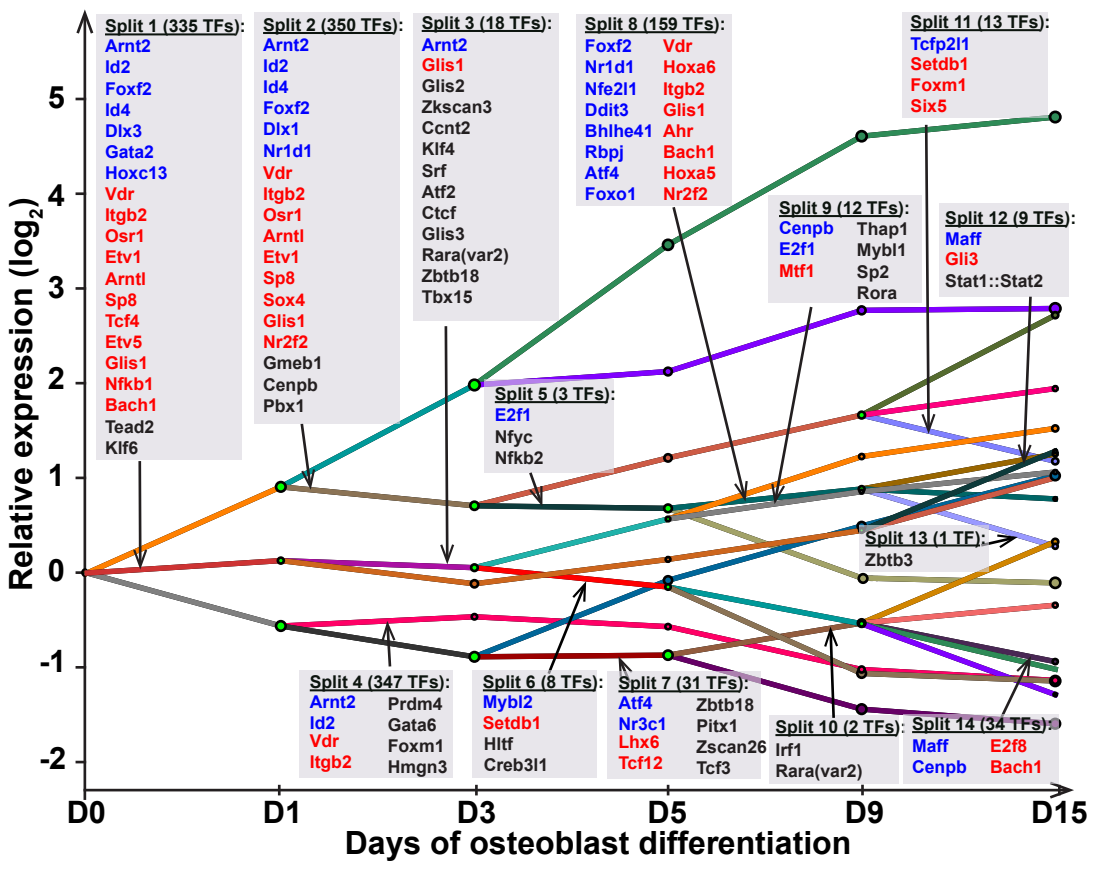

**Figure 4**

**A**

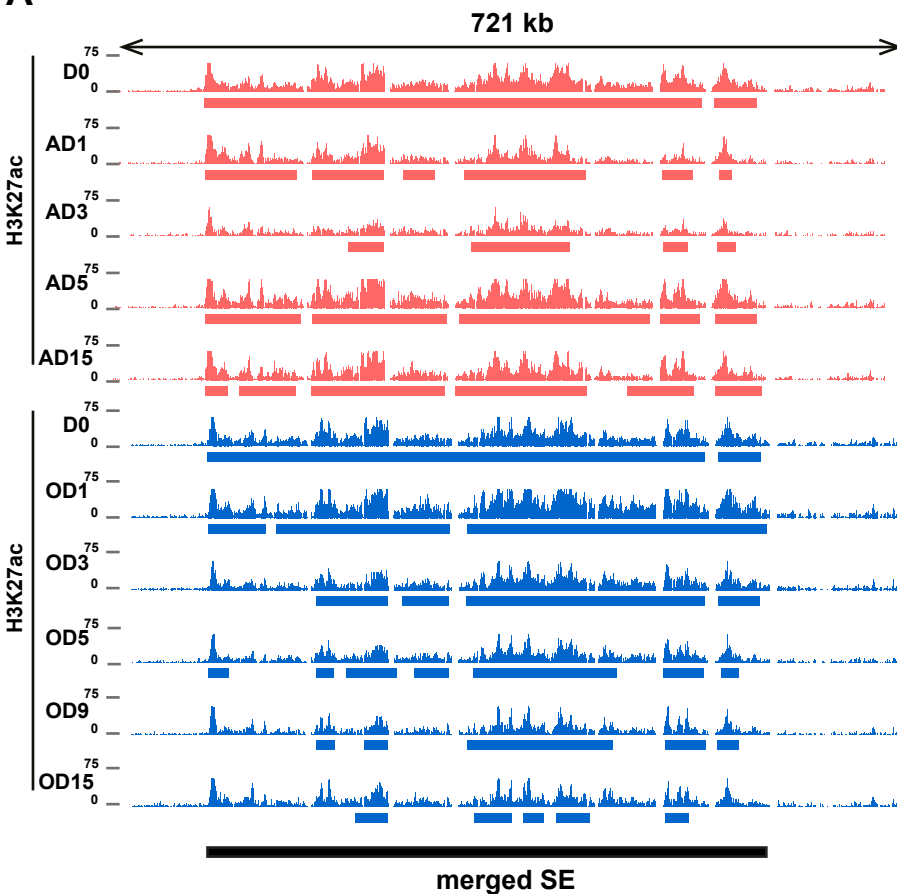

**B**

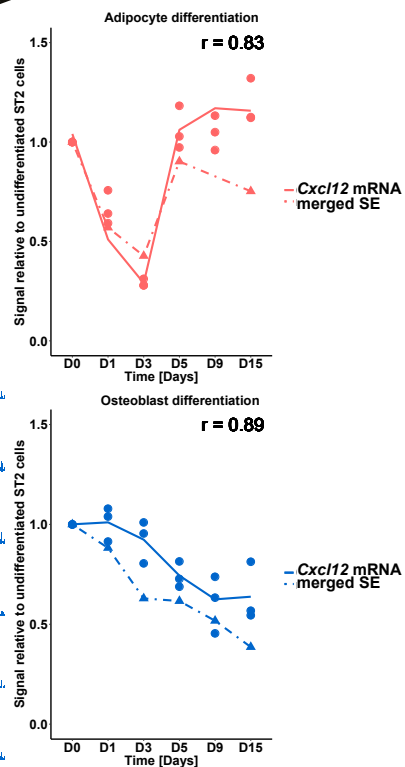

**C**

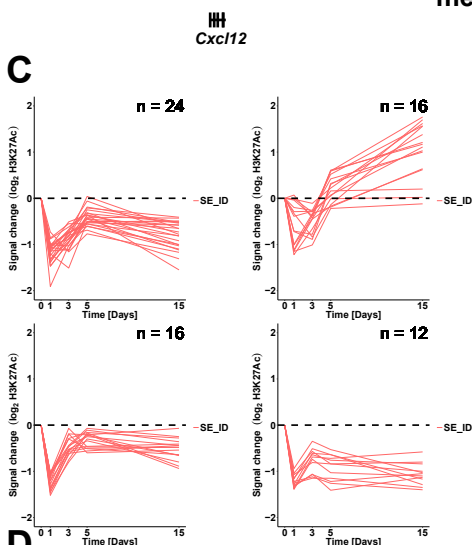

**D**

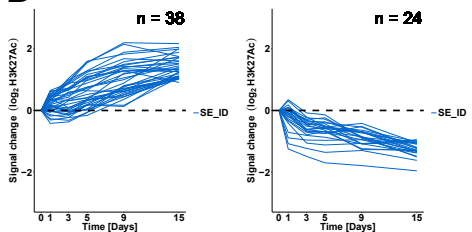

**E**

Dynamic merged SEs in adipocytes ( $\log_2 FC \geq 1$ )

Dynamic merged SEs in osteoblasts ( $\log_2 FC \geq 1$ )

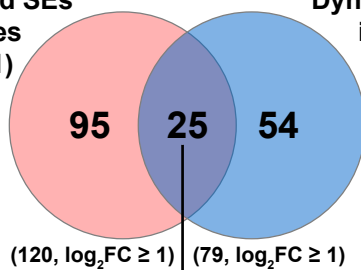

|                            |                            |                            |                            |                              |
|----------------------------|----------------------------|----------------------------|----------------------------|------------------------------|
| Sned1 <sub>[SE-38]</sub>   | Nav3 <sub>[SE-214]</sub>   | Ahr <sub>[SE-284]</sub>    | Ahr <sub>[SE-285]</sub>    | Ahr <sub>[SE-286]</sub>      |
| Slc4a7 <sub>[SE-360]</sub> | Kctd12 <sub>[SE-398]</sub> | Kctd12 <sub>[SE-399]</sub> | Tprg <sub>[SE-519]</sub>   | Tprg <sub>[SE-520]</sub>     |
| Cd200 <sub>[SE-537]</sub>  | Enpp5 <sub>[SE-568]</sub>  | Slc5a7 <sub>[SE-577]</sub> | Slc5a7 <sub>[SE-578]</sub> | Kif16b <sub>[SE-746]</sub>   |
| Glis1 <sub>[SE-831]</sub>  | Mn1 <sub>[SE-860]</sub>    | Ptn <sub>[SE-878]</sub>    | Ptn <sub>[SE-879]</sub>    | Hibadh <sub>[SE-884]</sub>   |
| Cxcl12 <sub>[SE-921]</sub> | Hpgd <sub>[SE-982]</sub>   | Hpgd <sub>[SE-983]</sub>   | Ces1d <sub>[SE-999]</sub>  | Slco2a1 <sub>[SE-1048]</sub> |



**Figure 5**

**A**

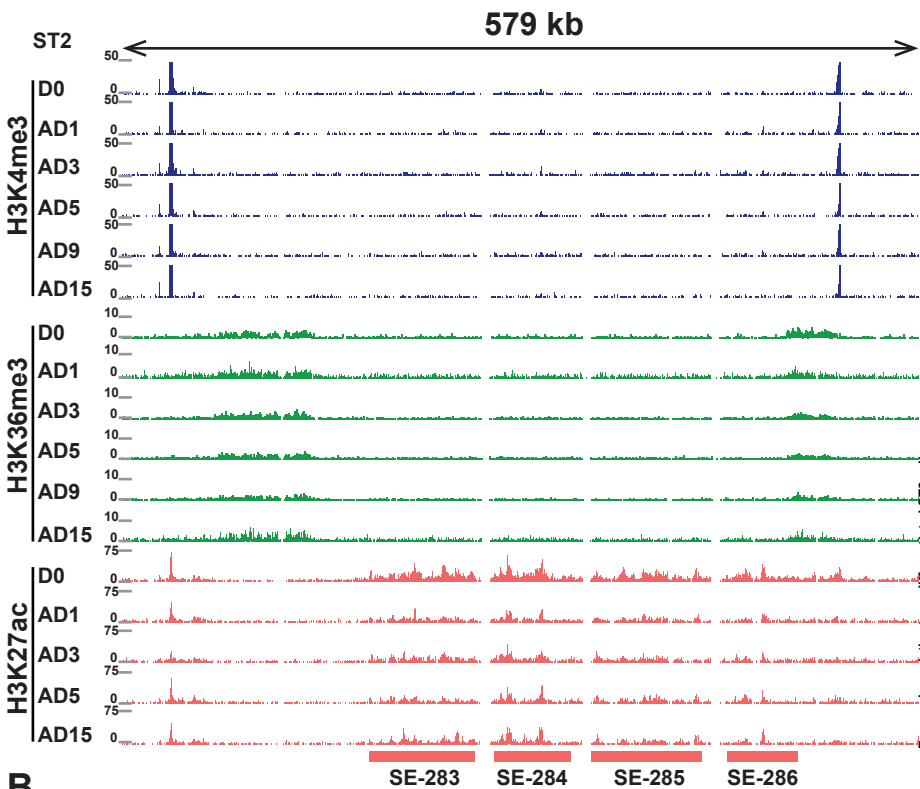

**B**

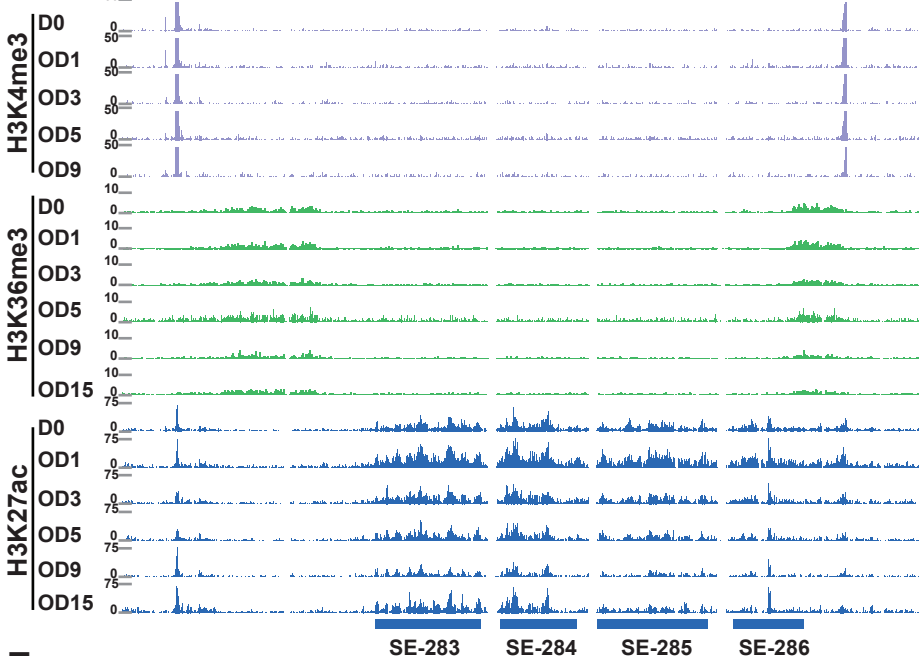

**C**

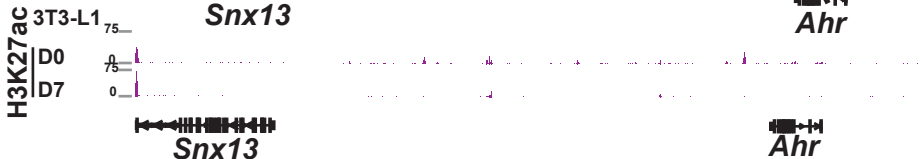

**C**

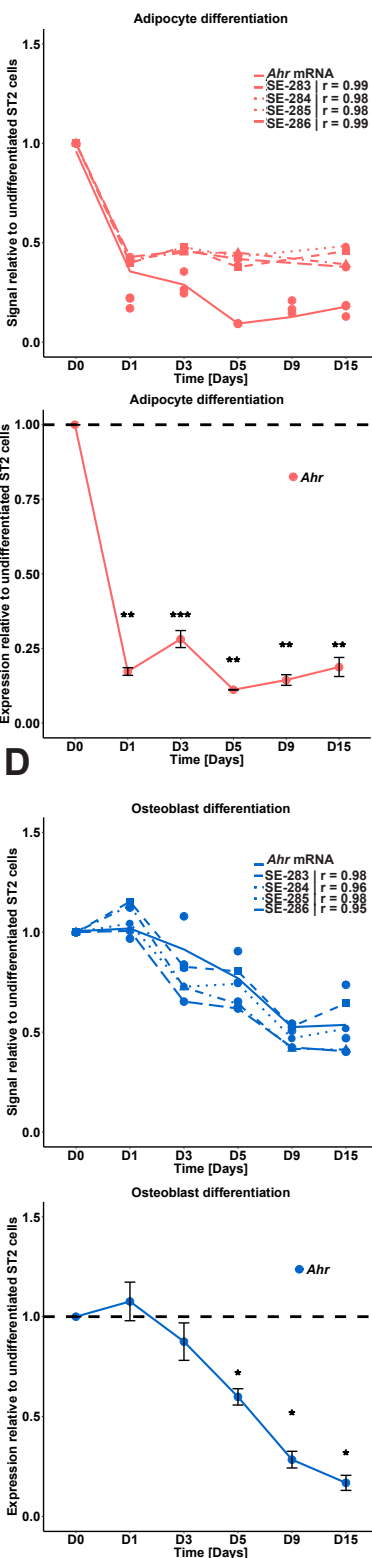

# Figure 6

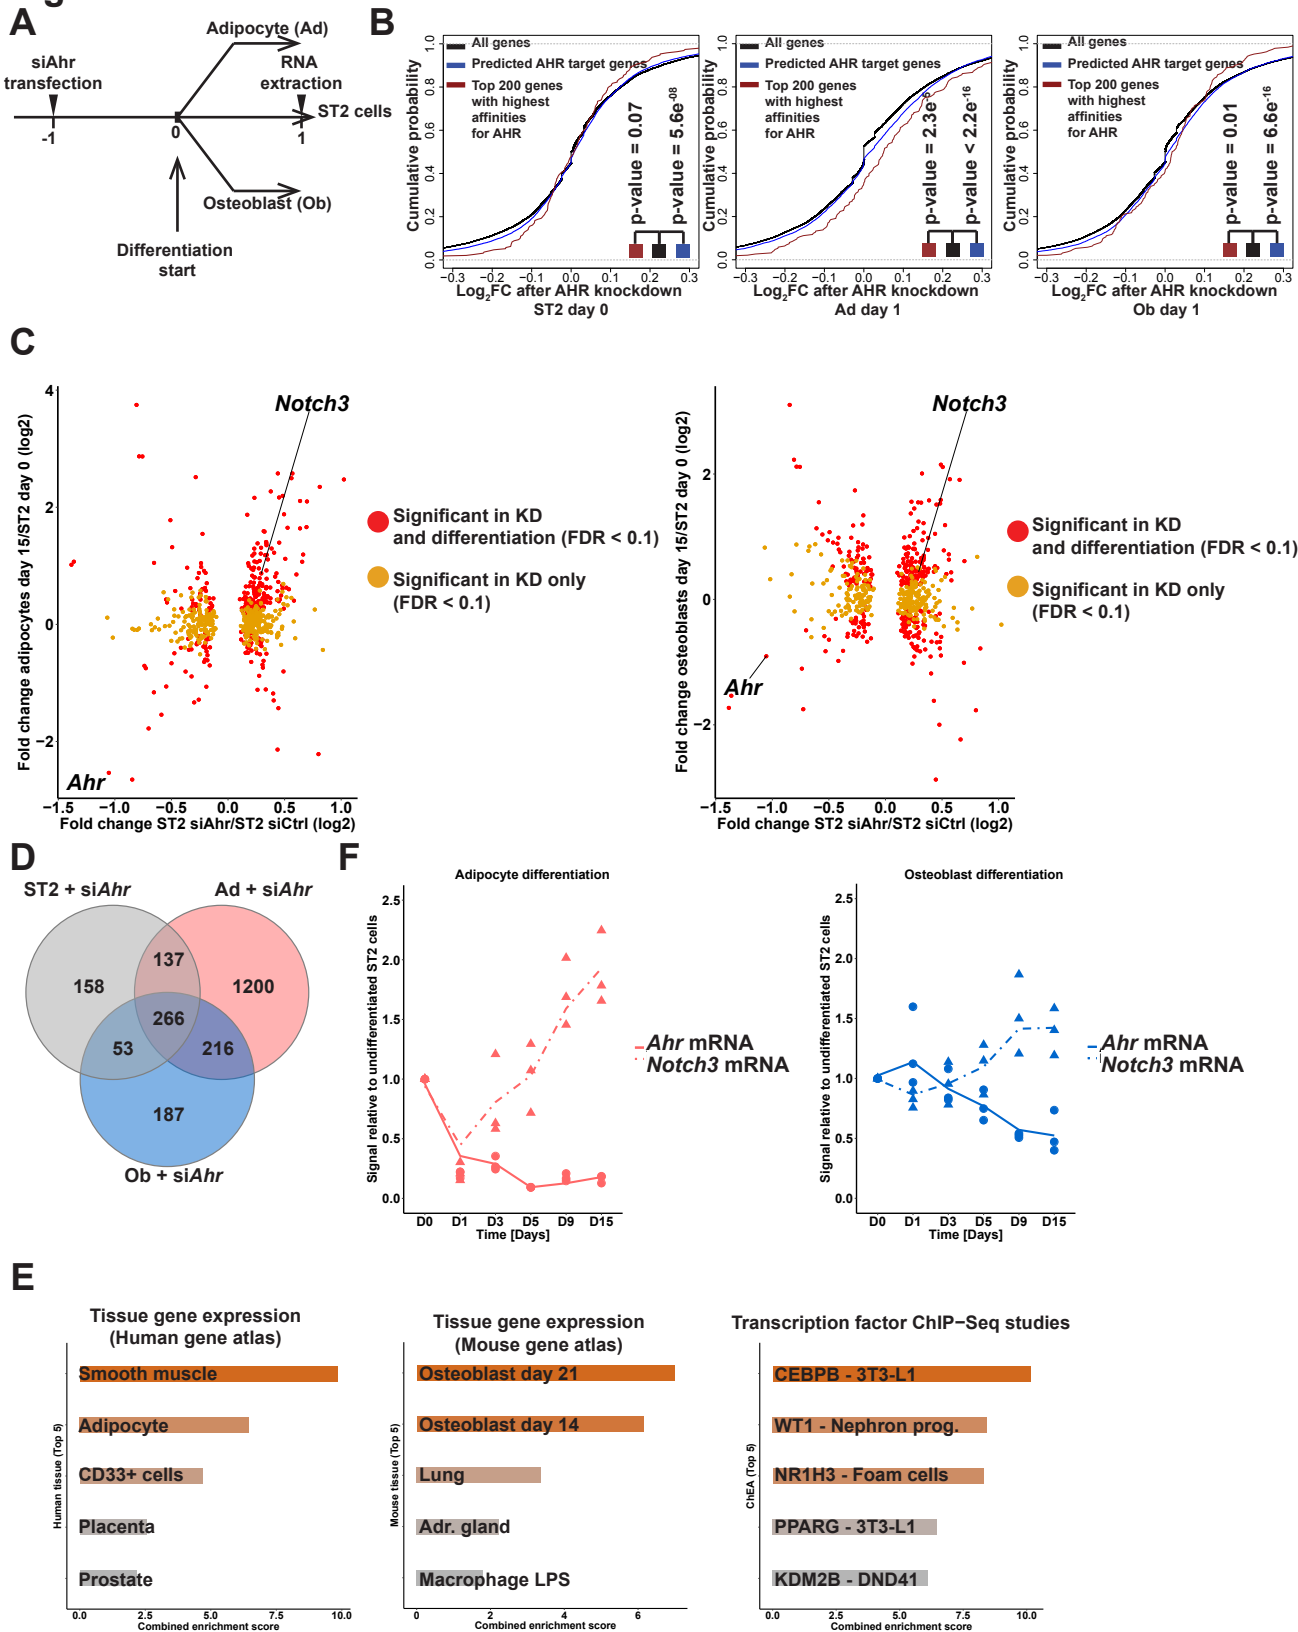

Gerard *et al.*: Time-series epigenomic profiles of mesenchymal differentiation

1 **Figure 1. Time-series RNA-seq and ChIP-seq profiling of adipocytes and**  
2 **osteoblasts from shared bone marrow progenitor cells.** (A) Schematic  
3 representation of the experimental set-up. ST2 MSCs were differentiated towards  
4 adipocytes or osteoblasts. Total RNA and chromatin was collected at the indicated  
5 time points from both differentiation time courses and subjected to RNA-seq or ChIP-  
6 seq analysis using antibodies against the indicated histone modifications. (B)  
7 Principle component analysis (PCA) of the RNA-seq data. All replicates are indicated  
8 with each time point in a different colour. Triangles marks the undifferentiated ST2  
9 cells, circles the adipocyte (Ad) samples and squares the osteoblast (Ob) samples. (C)  
10 Venn diagram comparing all differentially expressed genes at any time point of  
11 adipogenesis ( $\log_2FC > 1$ ,  $FDR < 0.05$ ) to those similarly affected in  
12 osteoblastogenesis. (D) Heatmap depicting the top 100 genes with the highest  
13 variance across the time points and lineages.  
14  
15  
16  
17  
18  
19  
20  
21  
22  
23  
24  
25  
26

Gerard *et al.*: Time-series epigenomic profiles of mesenchymal differentiation

1 **Figure 2: Workflow of the EPIC-DREM approach.** (A-D) From time-series  
2 epigenetic experiments, e.g. DNase1-seq or Histone ChIP-seq, putative TF binding  
3 sites are identified through footprint/peak calling and are annotated with TF affinities  
4 using TRAP. (E-F) Random genomic regions with similar genomic characteristics  
5 (GC-content and length) compared to measured footprints/peaks are generated and  
6 annotated with TF affinities as well. (G) A TF- and timepoint-specific affinity  
7 threshold can be obtained by applying an empirical  $p$ -value threshold (e.g. 0.05) on  
8 the distribution of TF affinities calculated on the randomly selected regions. (H)  
9 Applying the threshold on the TF affinities computed in (D) results in a set of discrete  
10 TF affinities per TF and timepoint. (I-J) Using TEPIC, the discrete TF affinities are  
11 integrated into discrete, timepoint specific TF-gene association scores. (J-K) TF-gene  
12 associations and time-series gene expression data are used as input to DREM, which  
13 predicts regulators that distinguish subsets of genes that show similar gene expression  
14 changes over time. In panels A-J,K different time points are indicated by different  
15 colours.

16

17

18

19

20

21

22

23

24

25

26

1 **Figure 3. Derivation of lineage-specific regulatory interactions using EPIC-**  
2 **DREM.** EPIC-DREM clusters genes into paths of similar expression over time in (A)  
3 adipocyte and (B) osteoblast differentiation. Split points differentiate time point-  
4 specific changes in gene expression, that are annotated by DREM with matching TFs.  
5 The paths where the predicted TF-target gene interactions cover at least 30% of the  
6 genes in the upstream split point with a split score  $\leq 0.01$  are shown. The top TFs  
7 based on their time point-specific FCs and split scores are annotated in the grey  
8 boxes. The top TFs are colored depending whether they are induced (blue), repressed  
9 (red), or unchanged (black). The total number of TFs predicted to control each path is  
10 indicated and the corresponding TFs are listed in Supplementary Table S2.

11

12

13

14

15

16

17

18

19

20

21

22

23

Gerard *et al.*: Time-series epigenomic profiles of mesenchymal differentiation

1 **Figure 4. Identification of dynamic SEs.** (A) Overview depicting the enrichment of  
2 H3K27ac at the *Cxcl12* locus across the time points of adipogenesis (in magenta) and  
3 osteoblastogenesis (in light blue). The magenta and light blue bars indicate the SE  
4 regions identified by HOMER in adipogenesis and osteoblastogenesis, respectively,  
5 and black bar indicates the merged SE derived through overlapping of the individual  
6 SEs across the lineages. (B) The correlation between mRNA levels and SE signal.  
7 The *Cxcl12* mRNA levels as measured by RNA-seq and the merged SE signal at the  
8 *Cxcl12* locus as measured by the reads detected in the H3K27ac IPs are depicted  
9 across the time-series of adipocyte (upper panel) and osteoblast (lower panel)  
10 differentiation. Intact line = mRNA level and dashed line = merged SE signal.  $r =$   
11 Pearson correlation co-efficient (C-D) STEM clustering of the merged SEs according  
12 to their dynamic profiles identifies (C) 4 main profiles in adipogenesis and (D) two  
13 main profiles in osteoblastogenesis. The additional profiles are shown in  
14 Supplementary Figure S3. y-axis indicates the signal change in  $\log_2$ -scale. (E) Venn  
15 analysis of the dynamic merged SEs from both lineages identifies 25 shared dynamic  
16 SEs with  $\log_2FC \geq 1$ . The identified SEs and their proximal expressed genes with the  
17 highest correlation across time are listed in the box. Adipocyte D9 sample for  
18 H3K27ac was not included in the above analysis due to low number of mappable high  
19 quality reads.  
20  
21  
22  
23  
24  
25  
26

Gerard *et al.*: Time-series epigenomic profiles of mesenchymal differentiation

1 **Figure 5. AHR is regulated by multiple SEs with lineage-specific dynamics.** (A-B)  
2 Overview depicting the enrichments of H3K4me3 (in dark blue and purple),  
3 H3K36me3 (in light and dark green), and H3K27ac (magenta and light blue) at the  
4 *Ahr* locus across the time points of adipogenesis (A) and osteoblastogenesis (B),  
5 respectively. The magenta and light blue bars indicate the merged SE regions  
6 identified through the analysis described in Figure 4. See also Supplementary Figure  
7 S4. (C-D) *Ahr* downregulation correlates with a decreased signal from all four SEs.  
8 The *Ahr* mRNA level was measured across the differentiation by RNA-seq (upper  
9 panel) and RT-qPCR (lower panel) in both adipocyte (C) and osteoblast (D)  
10 differentiation and is indicated as the intact line. Dashed lines represent the signal  
11 from the individual indicated merged SEs.  $r$  = Pearson correlation co-efficient. The  
12 statistical significance for RT-qPCR measurements compared to the value on D0 was  
13 determined by two-tailed Student's t-test.  $*=p<0.05$ ,  $**=p<0.01$  and  $***=p<0.001$ .  
14 Data points represent mean of 3 biological replicates +/- SEM. AD9 sample for  
15 H3K27ac and OD15 for H3K4me3 were not included in the above analysis due to  
16 lower number of mappable high quality reads. (E) Overview depicting the enrichment  
17 of H3K27ac at the *Ahr* locus in the confluent undifferentiated (D0) and differentiated  
18 (D7) 3T3-L1 adipocyte cell line. No SE formation could be detected in these more  
19 lineage-committed cells. The data were obtained from (Mikkelsen et al., 2010). The  
20 H3K27ac enrichments at the corresponding locus in human cell types are indicated in  
21 Supplementary Figure S5.

22

23

24

25

Gerard *et al.*: Time-series epigenomic profiles of mesenchymal differentiation

1 **Figure 6. AHR-KD confirms EPIC-DREM predictions and leads to induction of**  
2 **Notch3 and other lineage-specific genes.** (A) Schematic representation of the  
3 experimental set-up. See Supplementary Figure S6 for the efficiency of the AHR  
4 downregulation. (B) Confirmation of EPIC-DREM predictions. Cumulative  
5 distribution of all expressed genes (black line), all EPIC-DREM predicted AHR  
6 target genes (blue line), and top 200 targets of AHR (red line) in relation to their FC  
7 upon AHR depletion per condition as indicated. The significance of the increased FC  
8 of the AHR targets was confirmed with the Kolmogorov-Smirnov test and the  
9 corresponding p-values are indicated. (C) Scatter plots indicating the transcriptome-  
10 wide log<sub>2</sub>-FCs as measured by RNA-seq in undifferentiated ST2 cells with reduced  
11 AHR levels in comparison to the log<sub>2</sub>-FCs of the same transcripts in D15  
12 differentiated adipocytes (left panel) or osteoblasts (right panel). The colour code  
13 separates transcripts expressed differentially only in AHR-KD (yellow), or both in  
14 KD and in differentiation (red). (D) Venn diagram comparing the differentially  
15 expressed genes from the three different KD conditions (FDR<0.1) identifies 266  
16 genes consistently deregulated in all conditions. (E) Enrichment analysis of the 266  
17 identified AHR targets their preferred tissue expression profiles in human and mouse,  
18 and proteins identified as shared regulators in existing ChIP-seq studies. Top5 most  
19 enriched hits are shown for each type of enrichment. X-axis indicates the combined  
20 enrichment score (Chen et al., 2013) and coloring the enrichment p-value. (F) *Notch3*  
21 is induced in parallel with *Ahr* downregulation. The *Ahr* (intact line) and *Notch3*  
22 (dashed line) mRNA levels as measured by RNA-seq are depicted across the time-  
23 series of adipocyte (left panel) and osteoblast (right panel) differentiation. The values  
24 for all biological replicates are indicated separately. See also Supplementary Figure  
25 S6 for other *Notch* receptors.
